# Supplementary material for: Synthesis of green light emitting fused pyrazolinopiperidines - photophysical and electrochemical studies
Source: Royal Society of Chemistry journal article supplement (doi:10.1039/c2ra22259k), 2012-10-30
Supplement: c2ra22259k.pdf [file c2ra22259k.pdf]

## Supporting Information

### List of the contents

|                   |                                                                                                                                                            |            |
|-------------------|------------------------------------------------------------------------------------------------------------------------------------------------------------|------------|
| <b>Scheme S1</b>  | Structure of 1-phenyl-3-((dimethylamino)styryl)-5-(dimethylamino)phenyl)-2-pyrazoline                                                                      | <b>S5</b>  |
| <b>Table S1</b>   | Choice of solvents for the synthesis of <b>1</b> under reflux conditions                                                                                   |            |
| <b>Table S2</b>   | Crystal data of selected compounds                                                                                                                         | <b>S7</b>  |
| <b>Table S3</b>   | Interactions observed in <b>1b</b> , <b>1c</b> , and <b>1f</b>                                                                                             | <b>S8</b>  |
| <b>Figure S1</b>  | Deshielding of proton H <sub>a</sub> and Shielding of proton H <sub>b</sub> with respect to position                                                       | <b>S9</b>  |
| <b>Figure S2</b>  | Deshielding of proton H <sub>a</sub> and Shielding of proton H <sub>b</sub> with respect to position and bulkiness                                         | <b>S10</b> |
| <b>Figure S3</b>  | UV-visible and fluorescence spectra of pyrazolopyridines dissolved in acetonitrile.                                                                        | <b>S11</b> |
| <b>Figure S4</b>  | Plot of solvent polarity parameter E <sub>T</sub> (30) versus non-radiative rate constant (K <sub>nr</sub> ) of <b>1</b> , <b>1d</b> , and <b>1e</b>       | <b>S12</b> |
| <b>Figure S5</b>  | Optimized geometries of <b>1</b> and <b>1e</b> using Gaussian 03 at B3LYP/6-31G level                                                                      | <b>S13</b> |
| <b>Figure S6</b>  | Molecular orbital diagrams of <b>1a</b> and <b>2a</b> calculated using Gaussian 03 at B3LYP/6-31G level of theory. Hydrogen atoms are omitted for clarity. | <b>S14</b> |
| <b>Figure S7</b>  | Molecular orbital diagrams of <b>1a</b> and <b>2a</b> calculated using Gaussian 03 at B3LYP/6-31G level of theory. Hydrogen atoms are omitted for clarity. | <b>S15</b> |
| <b>Figure S8</b>  | Molecular orbital diagrams of <b>1a</b> and <b>2a</b> calculated using Gaussian 03 at B3LYP/6-31G level of theory. Hydrogen atoms are omitted for clarity. | <b>S16</b> |
| <b>Figure S9</b>  | <sup>1</sup> H (top) and <sup>13</sup> C (bottom)-NMR spectra of compound <b>1</b>                                                                         | <b>S17</b> |
| <b>Figure S10</b> | <sup>1</sup> H (top) and <sup>13</sup> C (bottom)-NMR spectra of compound <b>1a</b>                                                                        | <b>S18</b> |
| <b>Figure S11</b> | <sup>1</sup> H (top) and <sup>13</sup> C (bottom)-NMR spectra of compound <b>1b</b>                                                                        | <b>S19</b> |

|                   |                                                                                   |            |
|-------------------|-----------------------------------------------------------------------------------|------------|
| <b>Figure S12</b> | $^1\text{H}$ (top) and $^{13}\text{C}$ (bottom)-NMR spectra of compound <b>1e</b> | <b>S20</b> |
| <b>Figure S13</b> | $^1\text{H}$ (top) and $^{13}\text{C}$ (bottom)-NMR spectra of compound <b>1c</b> | <b>S21</b> |
| <b>Figure S14</b> | $^1\text{H}$ (top) and $^{13}\text{C}$ (bottom)-NMR spectra of compound <b>1d</b> | <b>S22</b> |
| <b>Figure S15</b> | $^1\text{H}$ (top) and $^{13}\text{C}$ (bottom)-NMR spectra of compound <b>1f</b> | <b>S23</b> |
| <b>Figure S16</b> | $^1\text{H}$ (top) and $^{13}\text{C}$ (bottom)-NMR spectra of compound <b>2a</b> | <b>S24</b> |
| <b>Figure S17</b> | $^1\text{H}$ (top) and $^{13}\text{C}$ (bottom)-NMR spectra of compound <b>2b</b> | <b>S25</b> |
| <b>Figure S18</b> | $^1\text{H}$ (top) and $^{13}\text{C}$ (bottom)-NMR spectra of compound <b>2c</b> | <b>S26</b> |
| <b>Figure S19</b> | $^1\text{H}$ (top) and $^{13}\text{C}$ (bottom)-NMR spectra of compound <b>2d</b> | <b>S27</b> |
|                   | Cartesian coordinates of compound <b>1</b>                                        | <b>S28</b> |

### NMR and Crystallographic discussion :

Synthesized compounds were characterized by FTIR,  $^1\text{H}$  NMR,  $^{13}\text{C}$  NMR and HRMS analysis. Substitution at 2<sup>nd</sup> position, irrespective of its electron withdrawing and electron donating nature, shifts the stereogenic protons Ha towards deshielding region (**1b** > **1** > **2b**  $\Rightarrow$  5.04 > 4.60 > 4.53  $\delta$  ppm) and proton Hb towards shielding region (**1b** < **1** = **2b**  $\Rightarrow$  3.96 < 4.04 = 4.04  $\delta$  ppm) when compared to **1** and respective 4-substituted compounds as shown in Figure S1 (SI). This was further confirmed by replacement of fluorine by bulkier trifluoromethyl group at 2<sup>nd</sup> position, which shifts proton Ha to more deshielding region (**1c** < **1e** = 5.01 < 5.12  $\delta$  ppm) and Hb towards shielding region (**1c** > **1e** = 3.86 > 3.72  $\delta$  ppm) (SI, Figure S2). The vinylic proton (Hc) shifts slightly towards deshielding region when electron withdrawing groups (-I effect) are present on benzylidene ring irrespective of their position whereas that of electron donating groups (+I effect) slightly shifts the proton towards shielding region (**1b** < **1** < **1c** = 6.78 < 6.82 < 6.84  $\delta$  ppm).

Single crystal structures of some of the representative compounds were determined to examine the conformations of these compounds. Earlier, we have reported structure of **1d**, (7E)-5-Benzyl-7-(2-chlorobenzylidene)-3-(2-chlorophenyl)-2-phenyl-3,3a,4,5,6,7-hexahydro-2H-pyrazolo[4,3-c]pyridine.<sup>1</sup> A search in Cambridge Structural Database (version 5.31) for 2H-pyrazolo[4,3-c]pyridines retrieved none except **1d**. The structures of **1b**, **1c**, **1f** with adopted atomic numbering scheme is shown in Figure 1 a-c. In **1b** and **1c**, asymmetric units comprise of two different molecules with minor conformational differences (RMSD of 0.794 Å and 0.972 Å between different molecules of asymmetric units, respectively for **1b** and **1c**). These compounds are racemic mixtures. Similar to **1d**, the stereogenic centers, C3 and C3A of the reported models of **1b** and **1f** possess (R, R)-configurations (SI, Table S2). Interestingly crystal structure of **1c** reveals coexistence of (S, R) and (R, S) configurations of the stereogenic centers, C3 and C3A. This observation suggests that both configurations are energetically accessible. The coexistence of two configurations within an asymmetric unit has been previously observed for Boc-Leu-Dpg-Val-OMe.<sup>2</sup> The five membered dihydropyrazole ring (N1/N2/C3/C3A/C7A) adopts an envelope conformation with atom C3 at the flap of the envelope and an adjacent 6-membered piperidine ring (C3A/C4/N5/C6/C7/C7A) assumes a chair conformation, but substantially distorted from ideal geometry. Short intra-molecular C—H...halogen and C-H...O contacts were observed in **1b**, **1c** and **1f** leading to modulation of their photophysical properties (vide infra). A dimer is formed in **1f** (similar to **1d**) by

C29—Cl3•••Cg5<sup>i</sup> [symmetry code (i): 1 - x, 1 - y, 1 - z, Cg5 is the centroid of (C21–C26) ring]. The Cl3•••Cg5 distance and C29—Cl3•••Cg5 angle are 3.7407(15) Å and 137.9(1)°, respectively, whereas the minimum atomic distance in Cl3••• Cg5 is 3.366 (4) Å. Cg5 is the centroid of (C21–C26) ring. The C—Halogen••• $\pi$  dimeric interactions [also referred as PHD;  $\pi$ -halogen-dimer interactions] have been shown recently,<sup>3</sup> to play an important role in host-guest chemistry.<sup>4</sup> The notable interactions in the crystal packing are C-H... $\pi$  interactions (SI, Table S3).

## References

1. N. S. Karthikeyan, B. U. Mahesh, K. Sathiyarayanan, P. Raghavaiah and R. S. Rathore, *Acta Cryst.*, 2010, E66, o1734.
2. S. Prasad, S. Mitra, E. Subramanian, D. Velmurugan, R. B. Rao and P. Balaram, *Biochem. Biophys. Res. Commun.*, 1994, 198, 424.
3. A. N. M. M. Rahman, R. Bishop, D. C. Craig and M. L. Scudder, *Org. Biomol. Chem.*, 2004, 2, 175.
4. B. Nagaraj, T. Narasimhamurthy, H. S. Yathirajan, P. Nagaraja, R. S. Narasegowda and R. S. Rathore, *Acta Cryst. C*, 2005, 61, o177.

Scheme S1

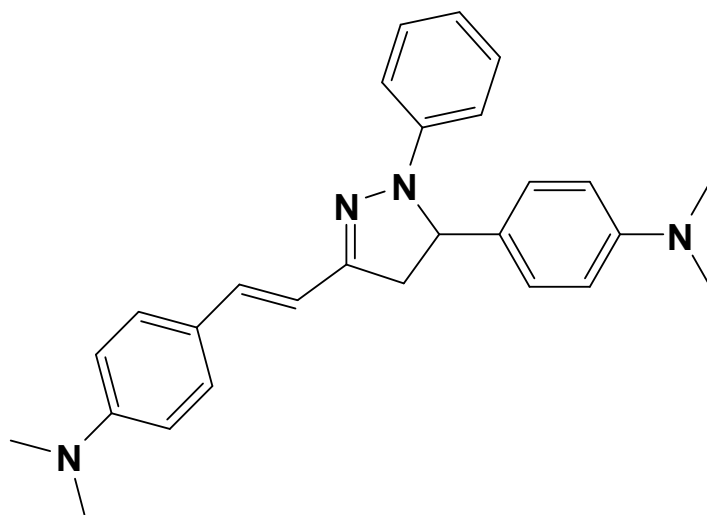

**Table S1** Choice of solvents for the synthesis of **1** under reflux conditions<sup>a</sup>

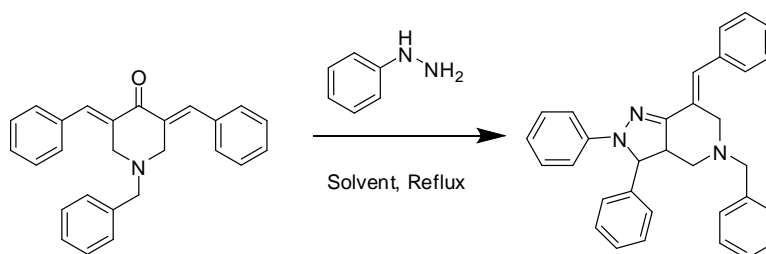

| Entry | Solvent           | Time(h) | % Yield <sup>b</sup> |
|-------|-------------------|---------|----------------------|
| 1     | Methanol          | 48      | 60                   |
| 2     | Ethanol           | 48      | 58                   |
| 3     | Iso-Propanol      | 14      | 86                   |
| 4     | n-Butanol         | 18      | 74                   |
| 5     | Acetic acid       | 36      | 68                   |
| 6     | Acetonitrile      | 36      | 30                   |
| 7     | Toluene           | 48      | 46                   |
| 8     | Ethyl acetate     | 48      | 10                   |
| 9     | Chloroform        | 24      | 0                    |
| 10    | Tetrahydrofuran   | 24      | 0                    |
| 11    | Dichloromethane   | 24      | 0                    |
| 12    | Acetone           | 24      | 0                    |
| 13    | Diethyl ether     | 24      | 0                    |
| 14    | Dimethylformamide | 36      | 70                   |
| 15    | Dimethylsulfoxide | 36      | 74                   |

<sup>a</sup>All the reactions were carried out by employing 0.001mol of curcumin derivatives (3a-3p), 0.001 mol of phenyl hydrazine in 10 ml of given solvent <sup>b</sup>isolated yields

**Table S2** Crystal data of selected compound

| compounds                                                       | <b>1c</b>                                                                  | <b>1f</b>                                                        | <b>1b</b>                                                                 |
|-----------------------------------------------------------------|----------------------------------------------------------------------------|------------------------------------------------------------------|---------------------------------------------------------------------------|
| Chemical formula                                                | C <sub>32</sub> H <sub>27</sub> F <sub>2</sub> N <sub>3</sub>              | C <sub>32</sub> H <sub>25</sub> Cl <sub>4</sub> N <sub>3</sub>   | C <sub>34</sub> H <sub>33</sub> N <sub>3</sub> O <sub>2</sub>             |
| Molecular Weight                                                | 491.57                                                                     | 593.35                                                           | 515.63                                                                    |
| Crystal size (mm)                                               | 0.6×0.4×0.2                                                                | 0.4×0.4×0.4                                                      | 0.4×0.4×0.3                                                               |
| Morphology                                                      | block, colorless                                                           | block, colorless                                                 | block, colorless                                                          |
| Crystal system                                                  | Triclinic                                                                  | Monoclinic                                                       | Triclinic                                                                 |
| Space group                                                     | P1bar                                                                      | P2 <sub>1</sub> /c                                               | P1bar                                                                     |
| Unit cell parameters,<br>a(Å), b(Å), c(c), α(°), β(°),<br>γ(°)  | 12.8417(9), 14.1308(9),<br>16.3607(11), 81.235(5),<br>69.026(6), 69.420(6) | 13.7524(4), 15.4132(5),<br>13.4826(4), 90.0,<br>101.715(3), 90.0 | 14.9779(8), 14.9860(8),<br>15.5420(9), 67.173(5),<br>88.293(4), 62.667(5) |
| Volume (Å <sup>3</sup> )                                        | 2594.1(3)                                                                  | 2798.36(15)                                                      | 2809.1(3)                                                                 |
| Z/Z'                                                            | 4/2                                                                        | 4/1                                                              | 4/2                                                                       |
| Cell measuring reflections                                      | 6319                                                                       | 12840                                                            | 7106                                                                      |
| θ-range (°)                                                     | 2.7-29.4                                                                   | 2.6-29.2                                                         | 2.6-29.2                                                                  |
| μ(mm <sup>-1</sup> )absorption<br>correction                    | 0.084,<br>multi-scan                                                       | 0.451,<br>multi-scan                                             | 0.076,<br>multi-scan                                                      |
| F(000)                                                          | 1032                                                                       | 1224                                                             | 1096                                                                      |
| D <sub>x</sub> (calculated) (g cm <sup>-3</sup> )               | 0.071                                                                      | 0.224                                                            | 2.318                                                                     |
| <b>Data Collection</b>                                          |                                                                            |                                                                  |                                                                           |
| Radiation (Å)                                                   | 0.71073 (MoKα)                                                             | 0.71073 (MoKα)                                                   | 0.71073 (MoKα)                                                            |
| Temperature (°K)                                                | 293                                                                        | 293                                                              | 293                                                                       |
| θ Range (°)                                                     | 2.7-26.0                                                                   | 2.6-26.0                                                         | 2.6-26.0                                                                  |
| Indices                                                         | h = -15 → 15<br>k = -17 → 17<br>l = -19 → 20                               | h = -16 → 16<br>k = -19 → 18<br>l = -16 → 16                     | h = -18 → 18<br>k = -18 → 18<br>l = -19 → 19                              |
| Scan type                                                       | ω scans                                                                    | ω scans                                                          | ω scans                                                                   |
| Independent reflections                                         | 10192                                                                      | 5500                                                             | 11037                                                                     |
| Observed Reflections<br>[I > 2σ(I)]                             | 4826                                                                       | 3932                                                             | 7218                                                                      |
| <b>Refinement</b>                                               |                                                                            |                                                                  |                                                                           |
| Final Indices                                                   | R = 0.0534, wR =<br>0.1529                                                 | R = 0.0482, wR =<br>0.1216                                       | R = 0.0529, wR =<br>0.1232                                                |
| Goodness of fit (S)                                             | 0.997                                                                      | 1.024                                                            | 1.020                                                                     |
| Extinction coefficient                                          | nil                                                                        | nil                                                              | nil                                                                       |
| (Δ/σ) <sub>max</sub>                                            | 0.0                                                                        | 0.0                                                              | 0.0                                                                       |
| Δρ <sub>max</sub> and Δρ <sub>min</sub><br>(e Å <sup>-3</sup> ) | 0.177, -0.198                                                              | 0.371, -0.406                                                    | 0.158, -0.207                                                             |
| Data/restraints/ parameter                                      | 10192/0/668                                                                | 5500/0/352                                                       | 11037/0/707                                                               |

$w = 1/[\sigma^2(F_o^2) + (aP)^2 + bP]$  where  $P = (F_o^2 + 2F_c^2)/3$ , parameters  $a$  and  $b$  are:  
 0.0471, 0.0 (1c), 0.0473, 1.7119 (1f) and 0.0425, 0.4372 (1b), respectively.

**Table S3** Interactions observed in **1b**, **1c**, and **1f**

|           | Interactions    | D-H...A                         | D-H (Å) | H...A (Å) | D...A (Å) | D-H...A (°) |
|-----------|-----------------|---------------------------------|---------|-----------|-----------|-------------|
| <b>1c</b> | Intra-molecular | C3A-H3A...F1A                   | 0.98    | 2.39      | 2.781(4)  | 103         |
|           |                 | C3B-H3B...F1B                   | 0.98    | 2.44      | 2.781(4)  | 100         |
|           |                 | C13A-H13A...N1A                 | 0.93    | 2.40      | 2.730(3)  | 100         |
|           | Inter-molecular | C32A-H32A...Cg10 <sup>i</sup>   | 0.93    | 2.97      | 3.761(5)  | 144         |
| <b>1f</b> | Intra-molecular | C3-H3...C11                     | 0.98    | 2.62      | 3.135(3)  | 113         |
|           |                 | C27-H27...C13                   | 0.93    | 2.74      | 3.034(3)  | 100         |
| <b>1b</b> | Intra-molecular | C4A-H4A2...O1A                  | 0.97    | 2.41      | 3.079(2)  | 126         |
|           |                 | C4B-H4B2...O1B                  | 0.97    | 2.40      | 3.072(2)  | 126         |
|           |                 | C19A-H19A...N2A                 | 0.93    | 2.48      | 2.844(3)  | 103         |
|           |                 | C19B-H19B...N2B                 | 0.93    | 2.48      | 2.842(3)  | 103         |
|           |                 | C20A-H20A...Cg11                | 0.97    | 2.96      | 3.923(3)  | 172         |
|           |                 | C34B-H34F...Cg12                | 0.96    | 2.99      | 3.772(3)  | 140         |
|           | Inter-molecular | C12B-H12B...Cg13 <sup>ii</sup>  | 0.93    | 2.95      | 3.718(3)  | 141         |
|           |                 | C16B-H16B...Cg13 <sup>iii</sup> | 0.93    | 2.93      | 3.776(3)  | 152         |
|           |                 | C25A-H25A...Cg10 <sup>iv</sup>  | 0.93    | 2.86      | 3.684(3)  | 149         |

Symmetry codes (i) 1-X,1-Y,1-Z, (ii), (iii).



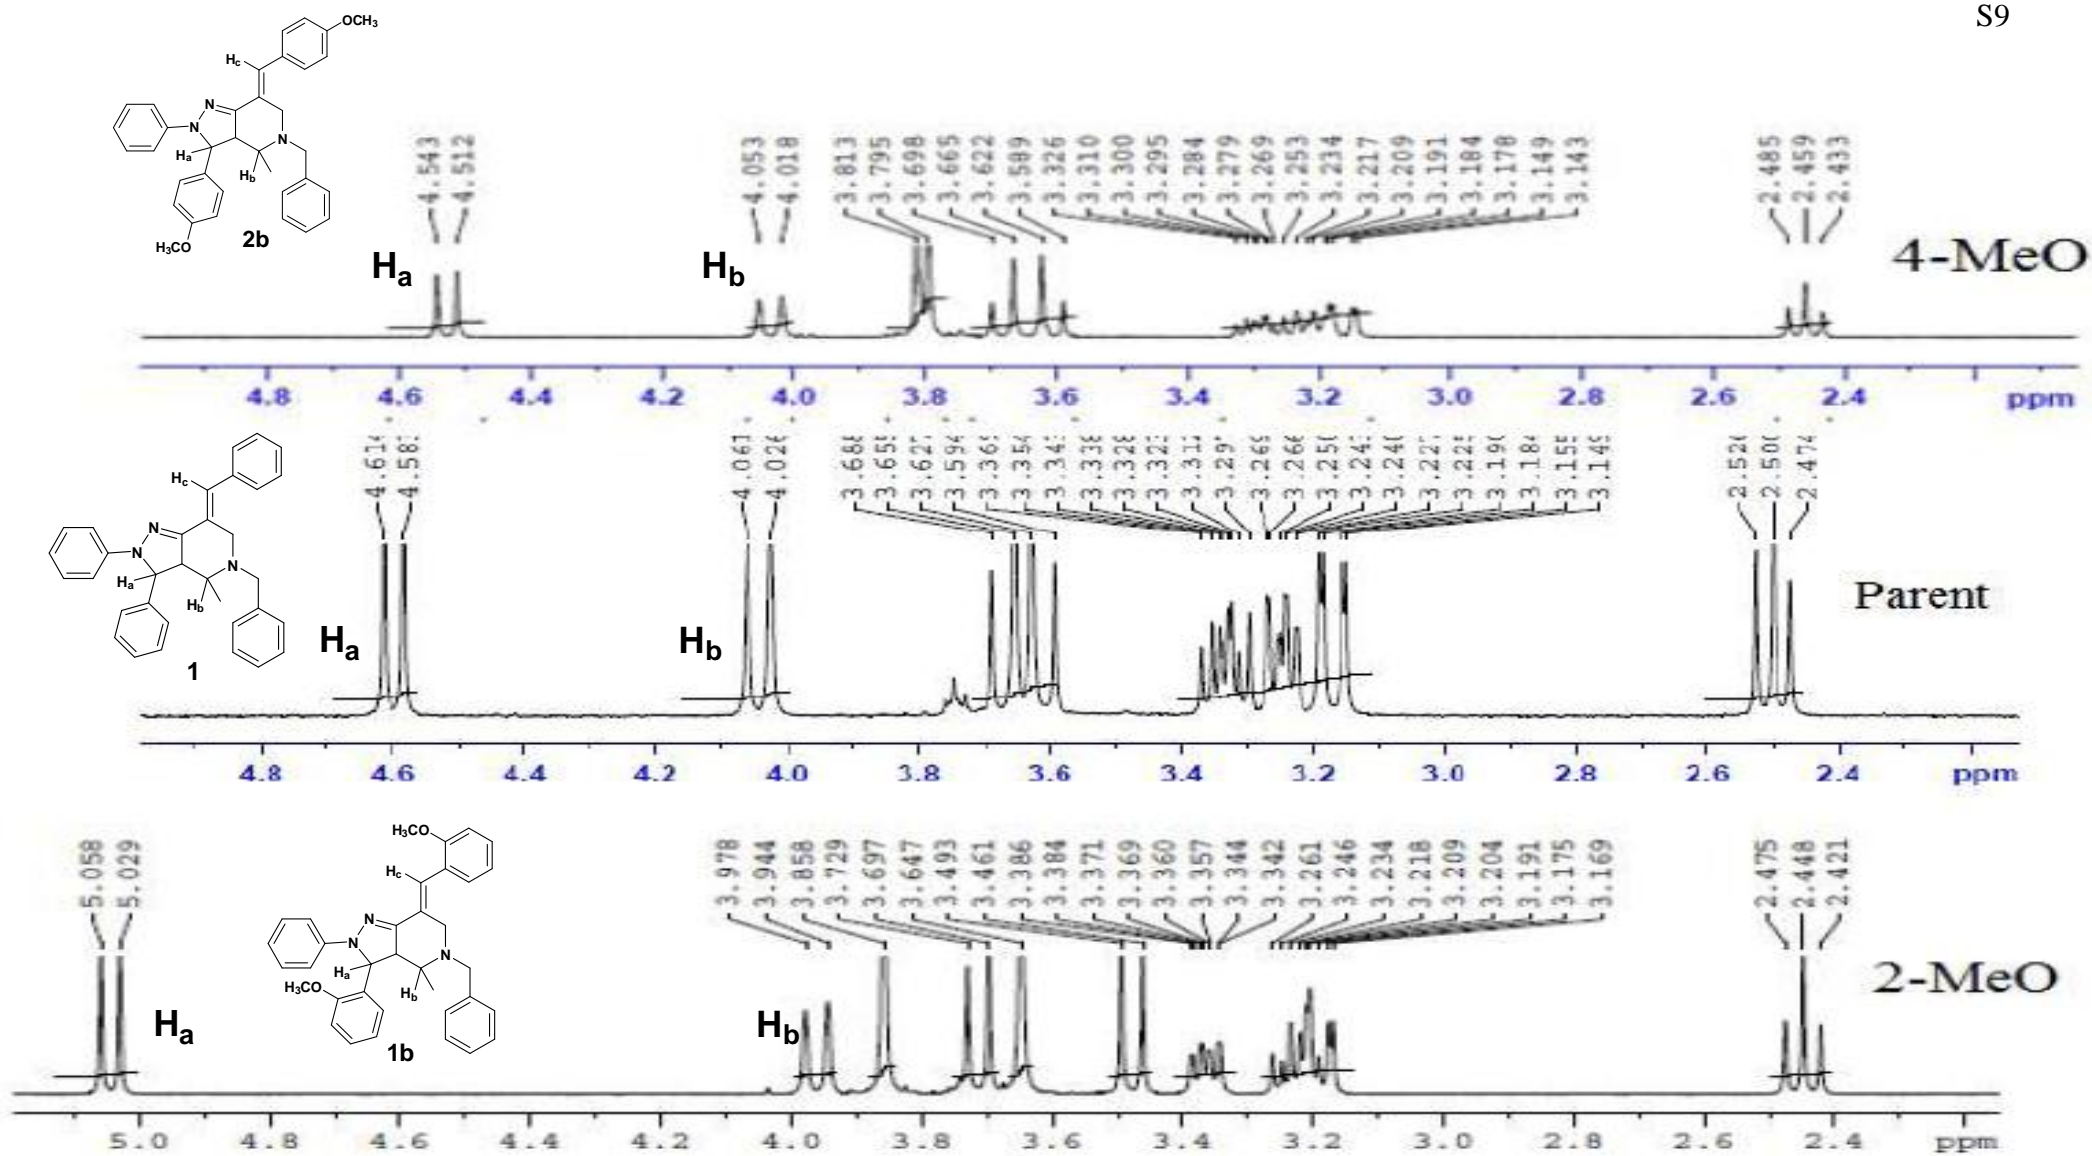

**Figure S1** Deshielding of proton H<sub>a</sub> and shielding of proton H<sub>b</sub> with respect to position

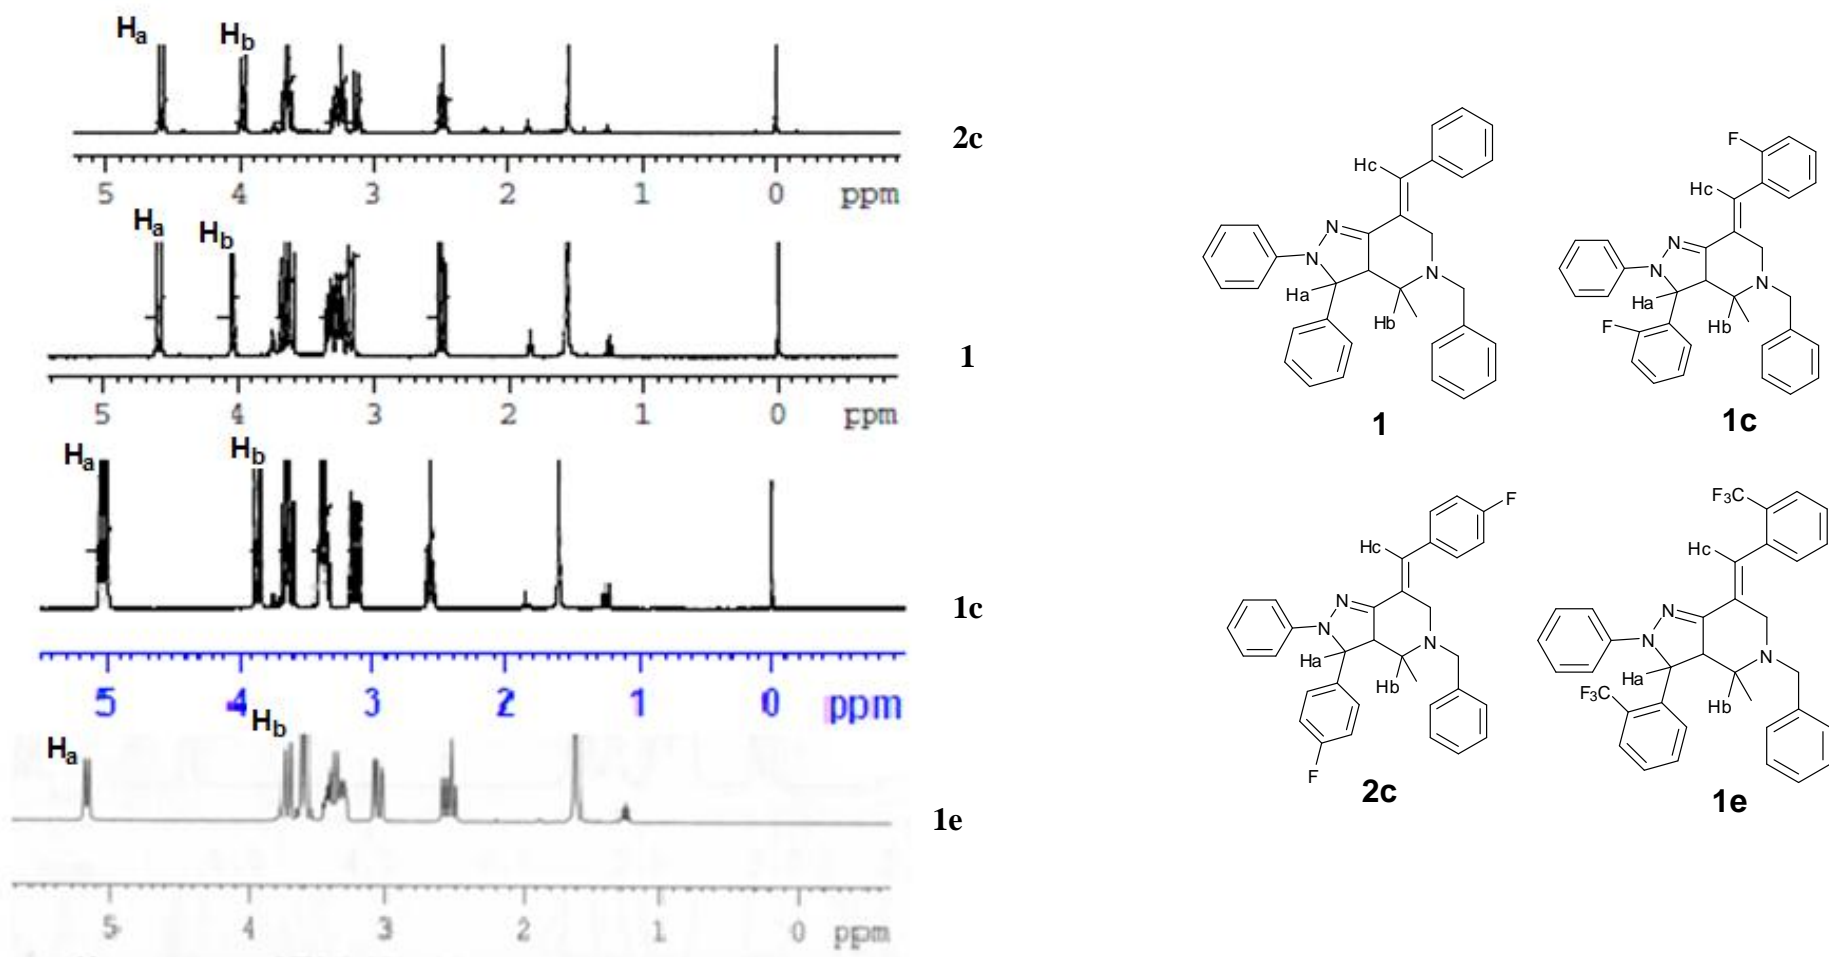

**Figure S2** Deshielding of proton H<sub>a</sub> and Shielding of proton H<sub>b</sub> with respect to position and bulkiness

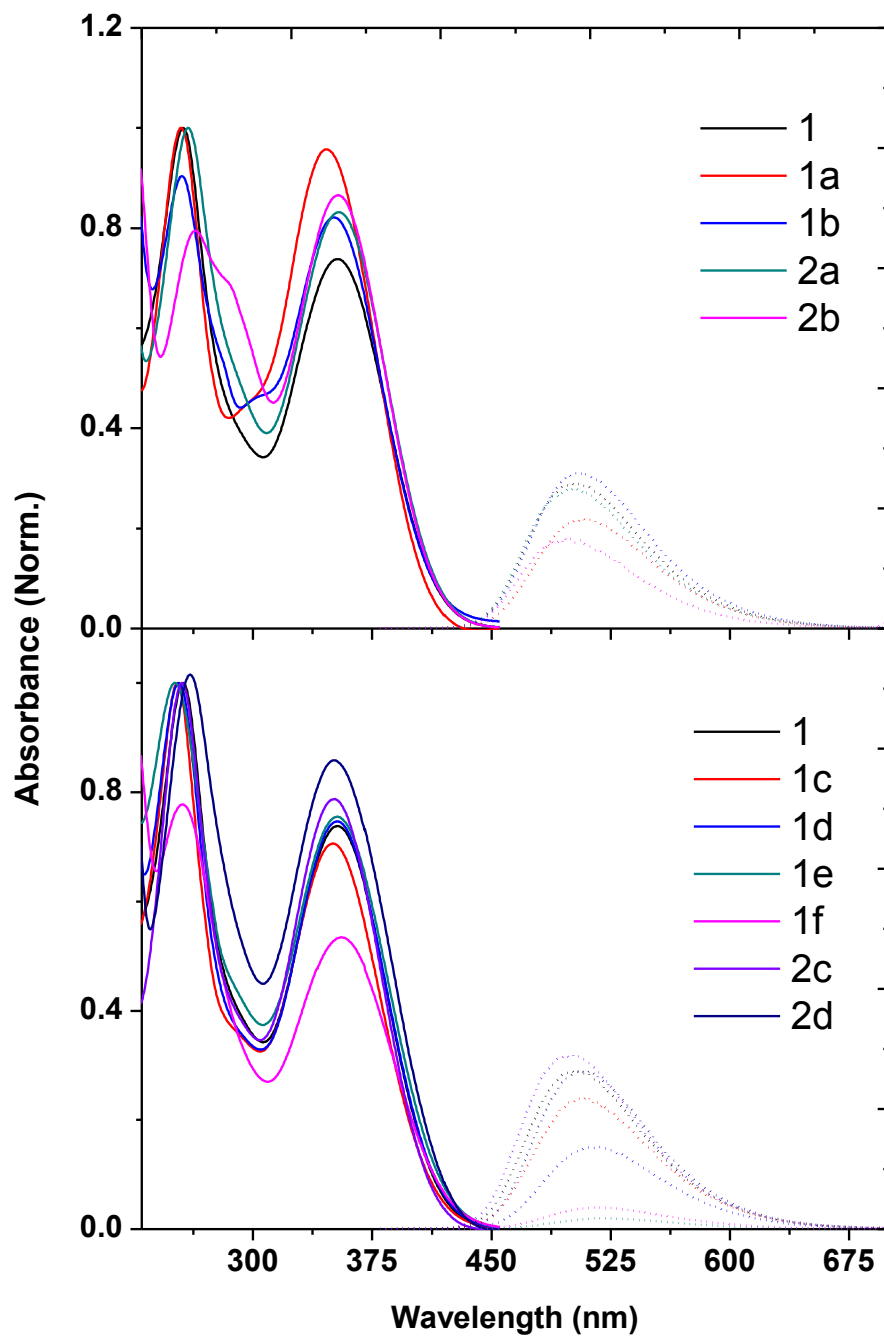

**Figure S3** UV-visible and fluorescence spectra of pyrazolo pyridines dissolved in acetonitrile.

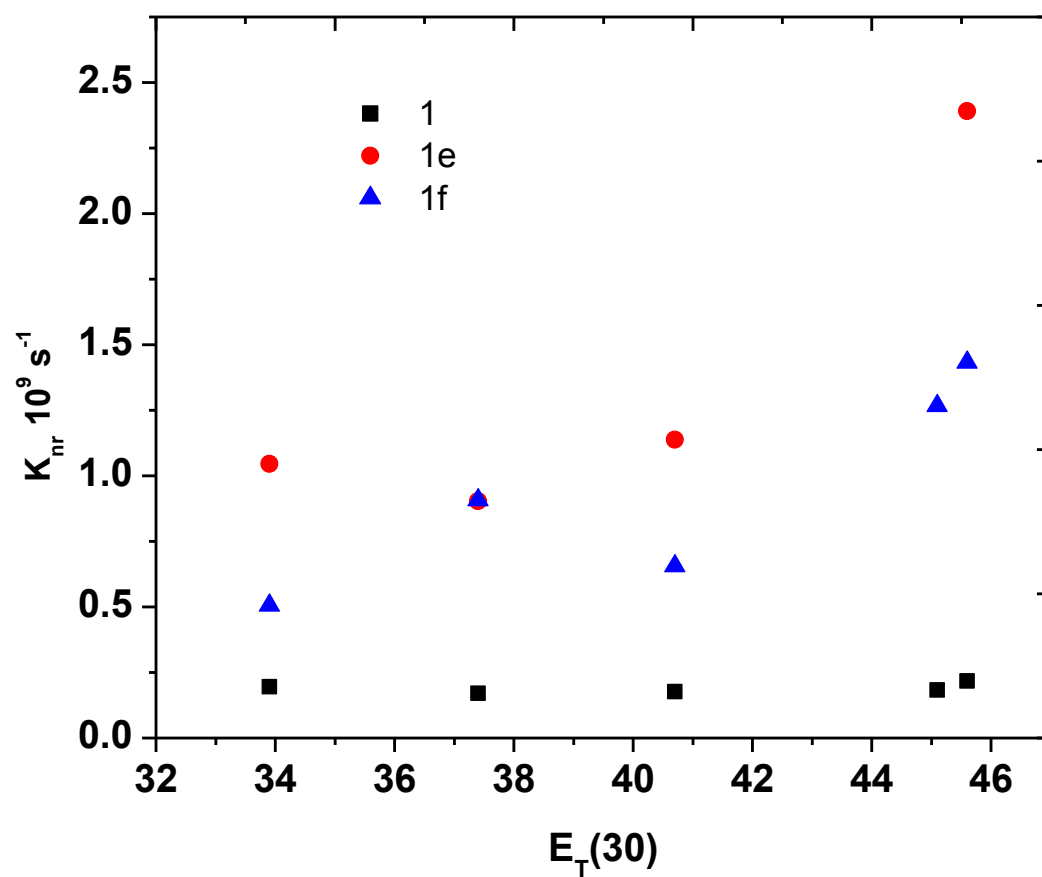

**Figure S4** Plot of solvent polarity parameter  $E_T(30)$  versus non-radiative rate constant ( $K_{nr}$ ) of **1**, **1e**, and **1f**

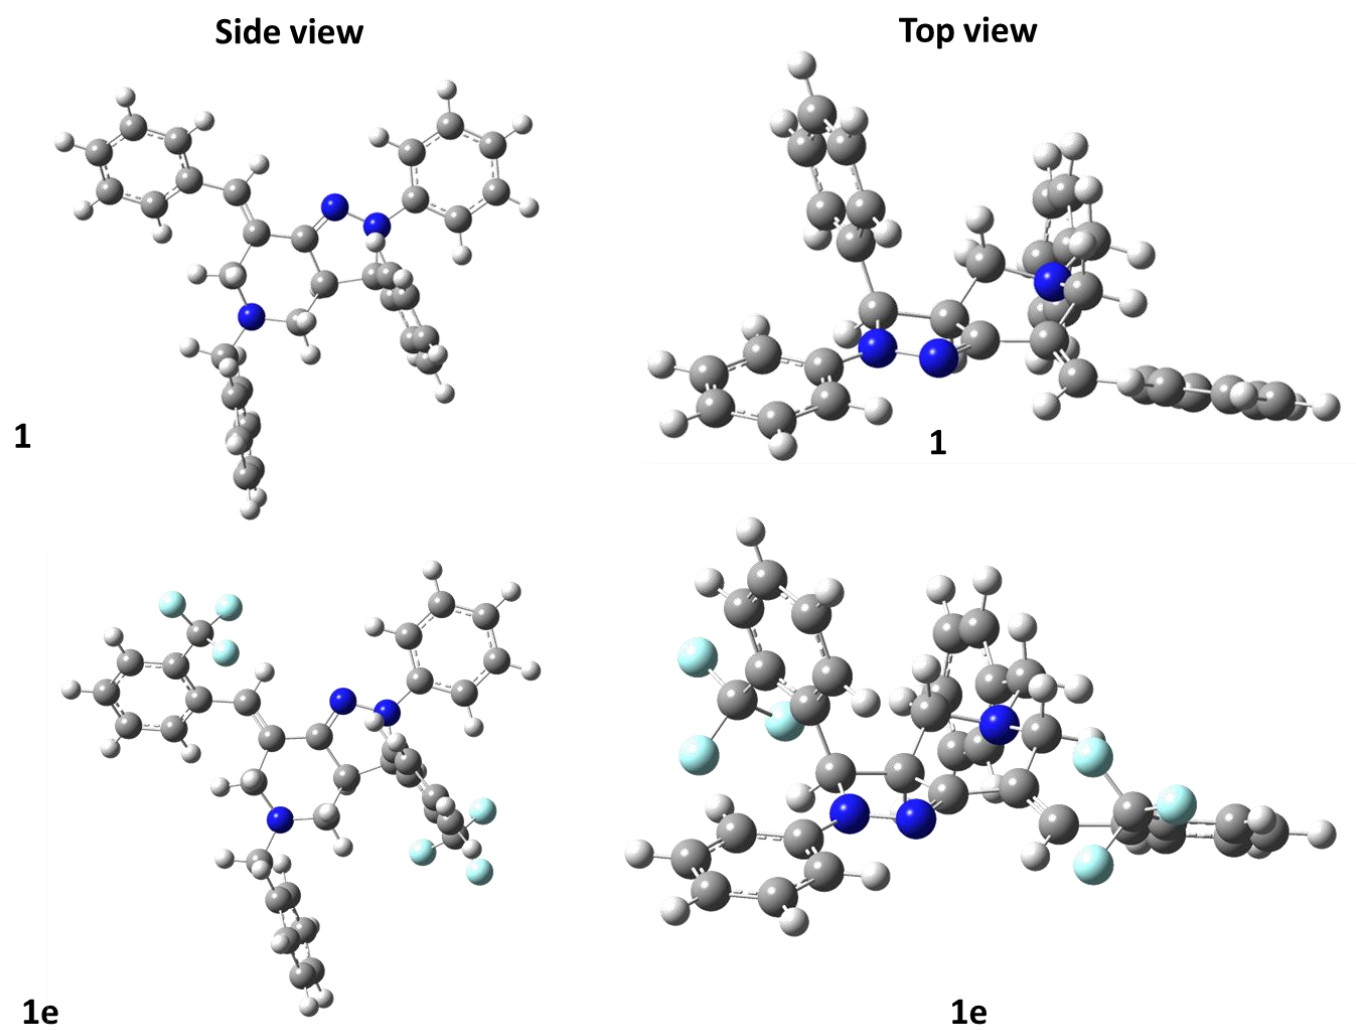

**Figure S5** Optimized geometries of **1** and **1e** using Gaussian 03 at B3LYP/6-31G level

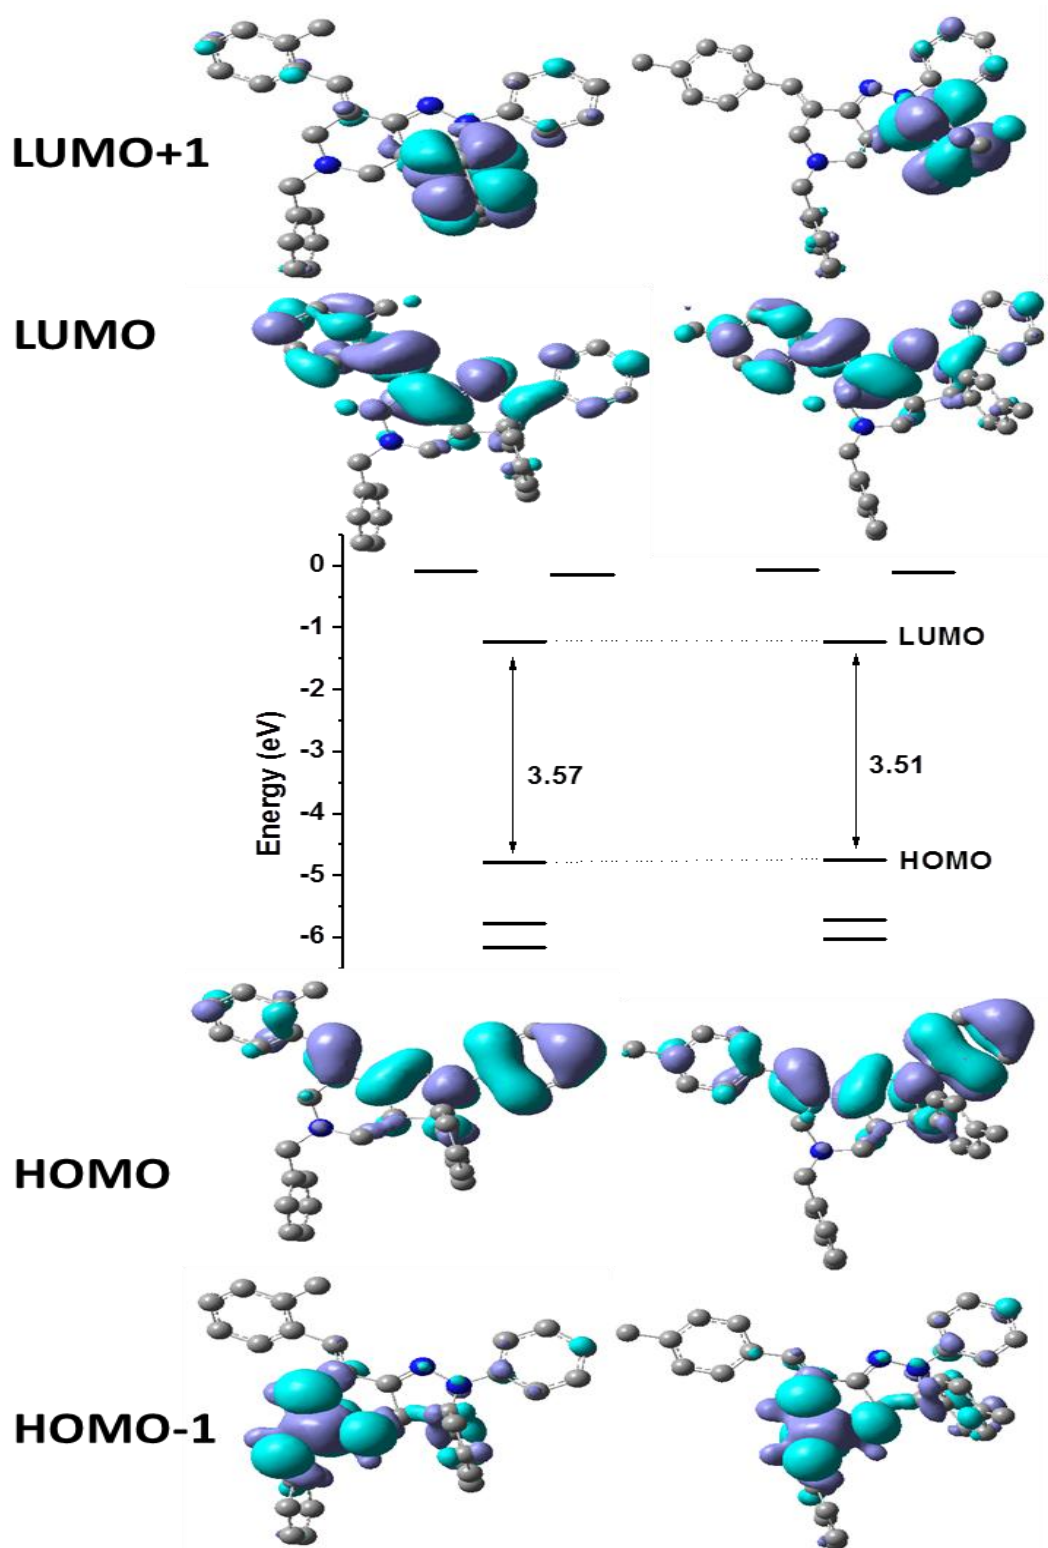

**Figure S6** Molecular orbital diagrams of **1a** and **2a** calculated using Gaussian 03 at B3LYP/6-31G level of theory. Hydrogen atoms are omitted for clarity.

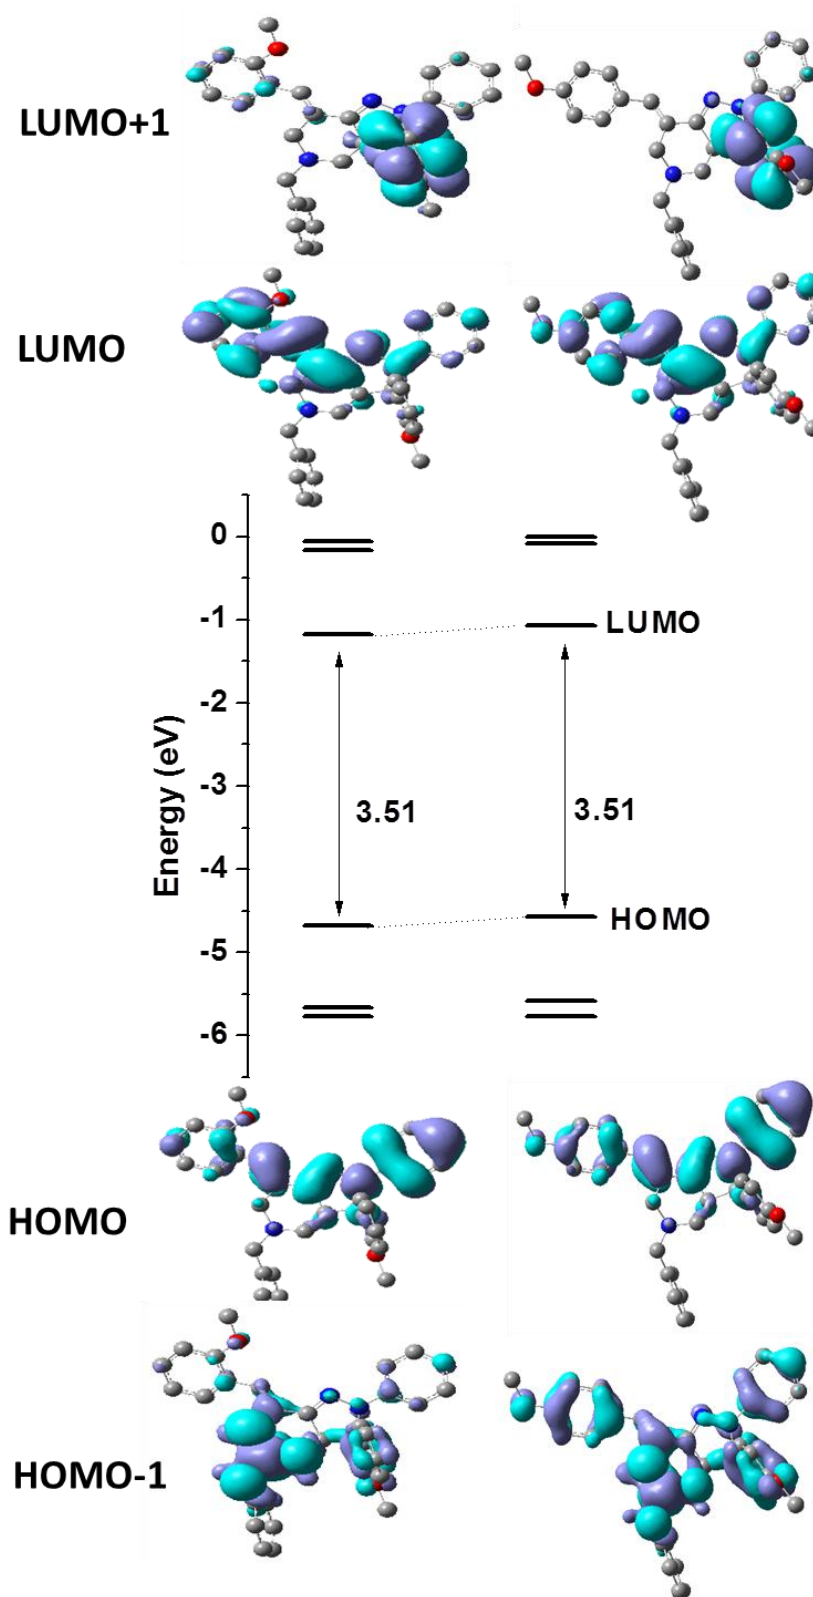

**Figure S7** Molecular orbital diagrams of **1b** and **2b** calculated using Gaussian 03 at B3LYP/6-31G level of theory. Hydrogen atoms are omitted for clarity.



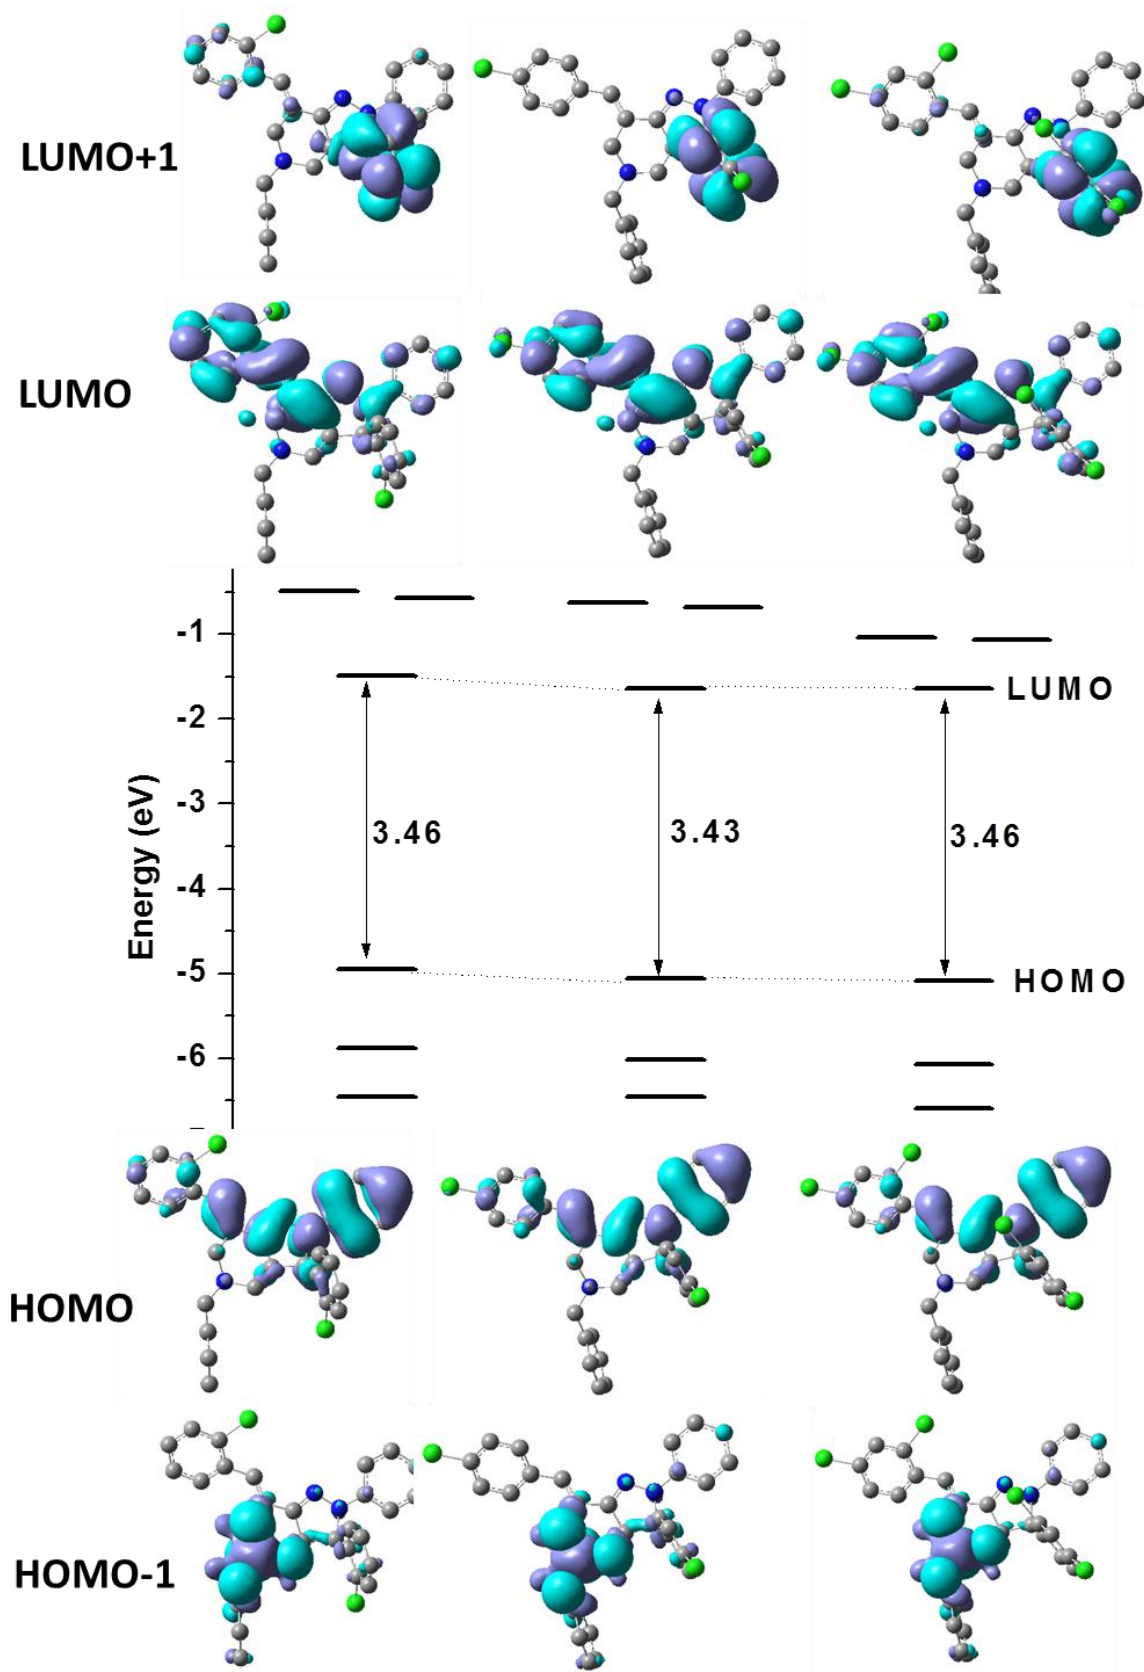

**Figure S8** Molecular orbital diagrams of **1d**, **2d**, and **1f** calculated using Gaussian 03 at B3LYP/6-31G level of theory. Hydrogen atoms are omitted for clarity.



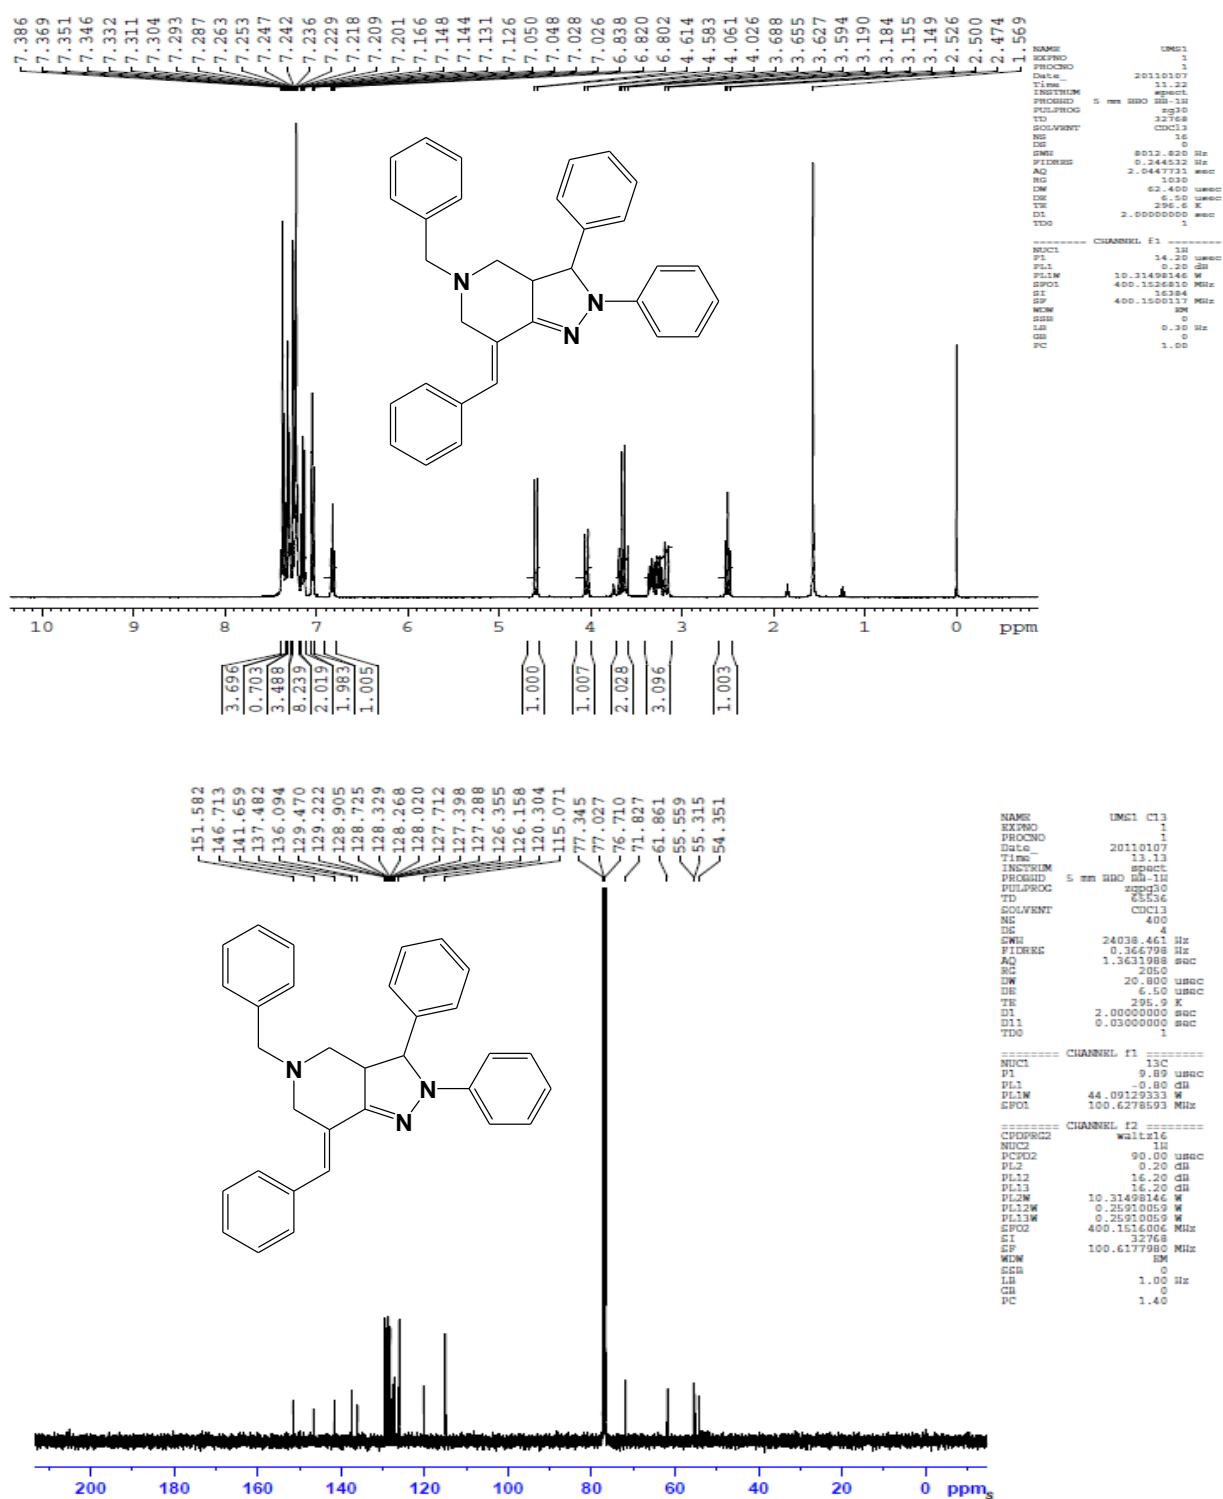

Figure S9 <sup>1</sup>H (top) and <sup>13</sup>C (bottom)-NMR spectra of compound 1

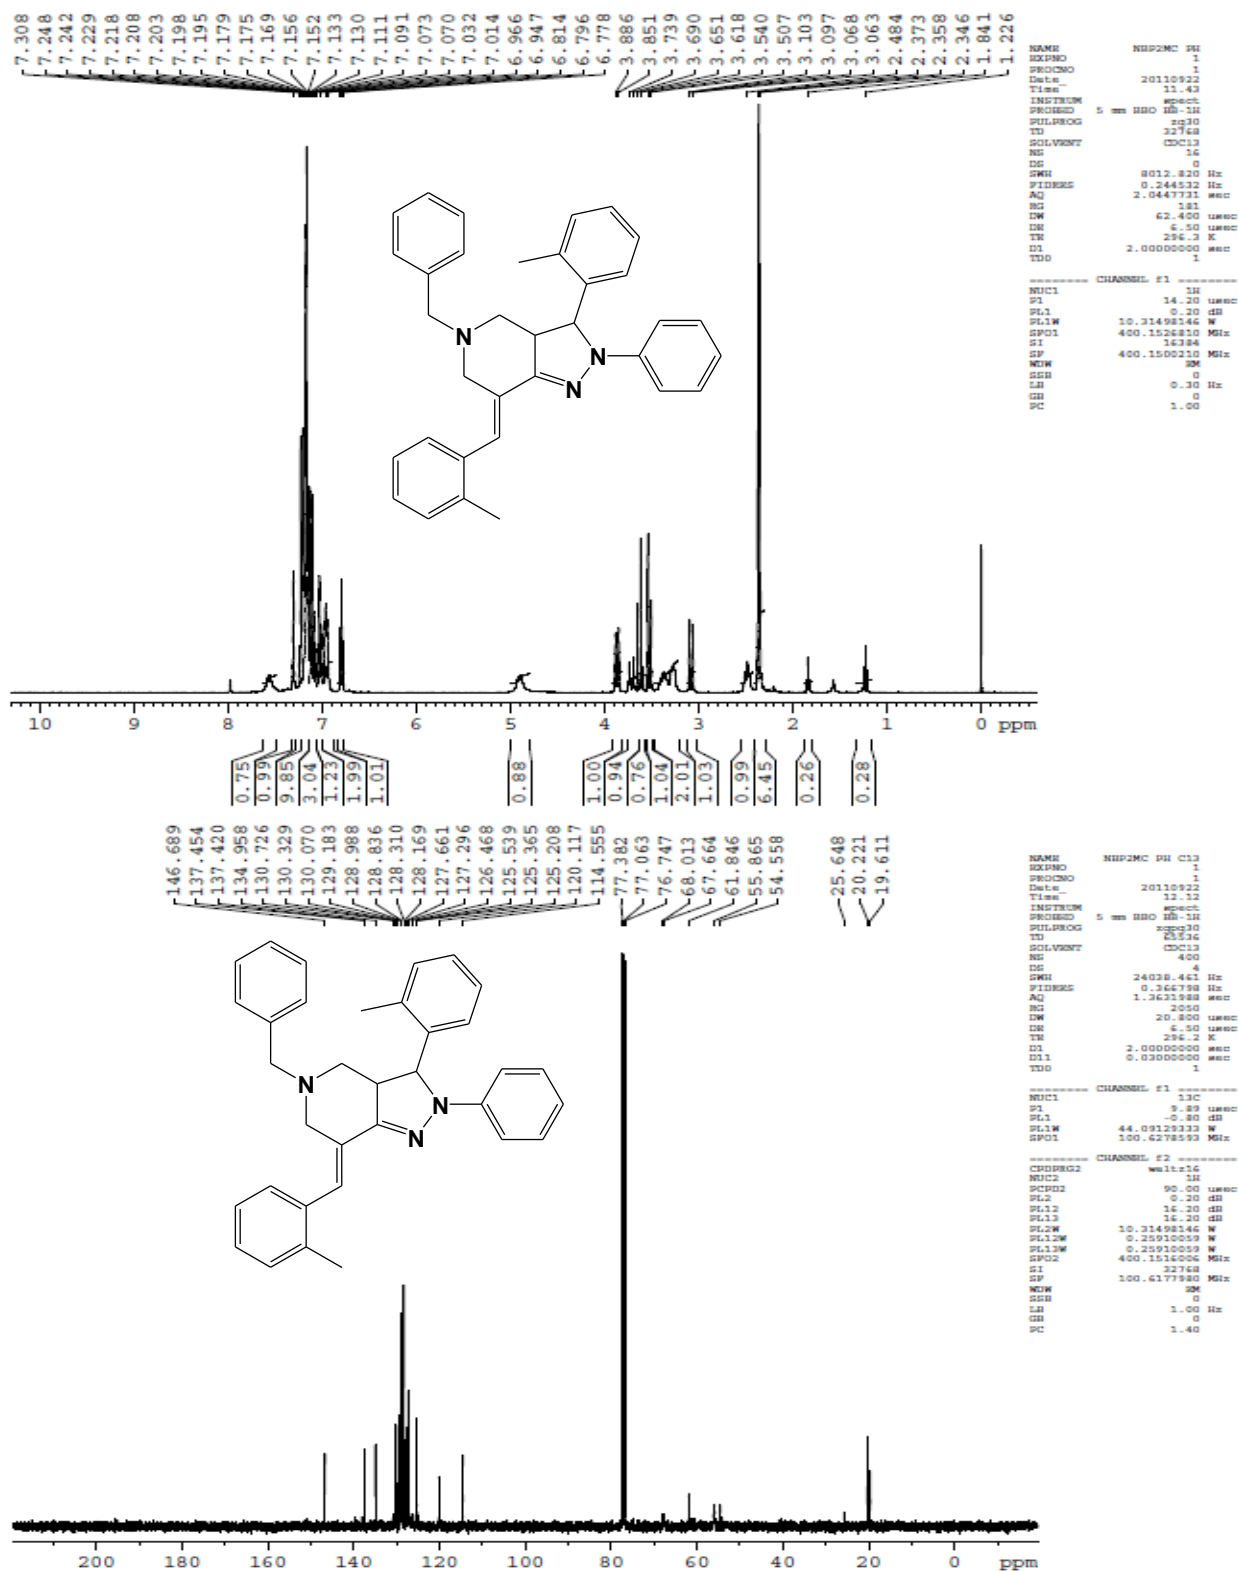

Figure S10 <sup>1</sup>H (top) and <sup>13</sup>C (bottom)-NMR spectra of compound 1a

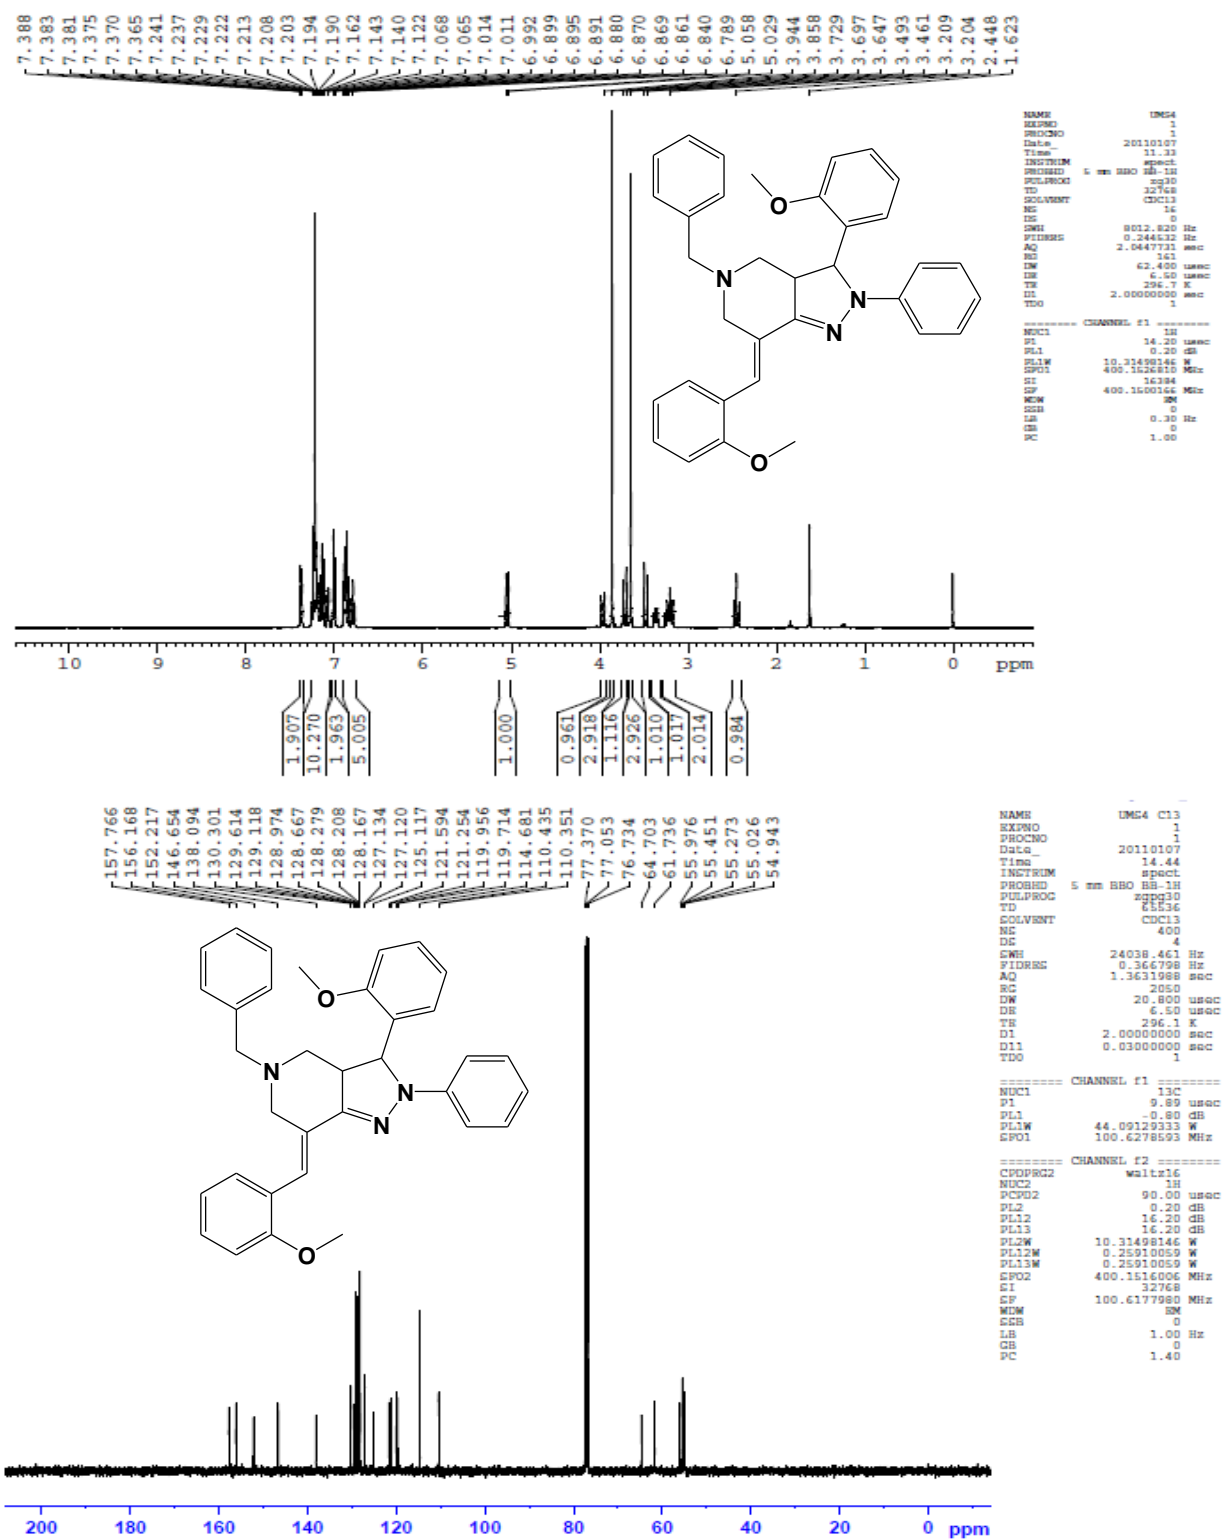

Figure S11 <sup>1</sup>H (top) and <sup>13</sup>C (bottom)-NMR spectra of compound 1b

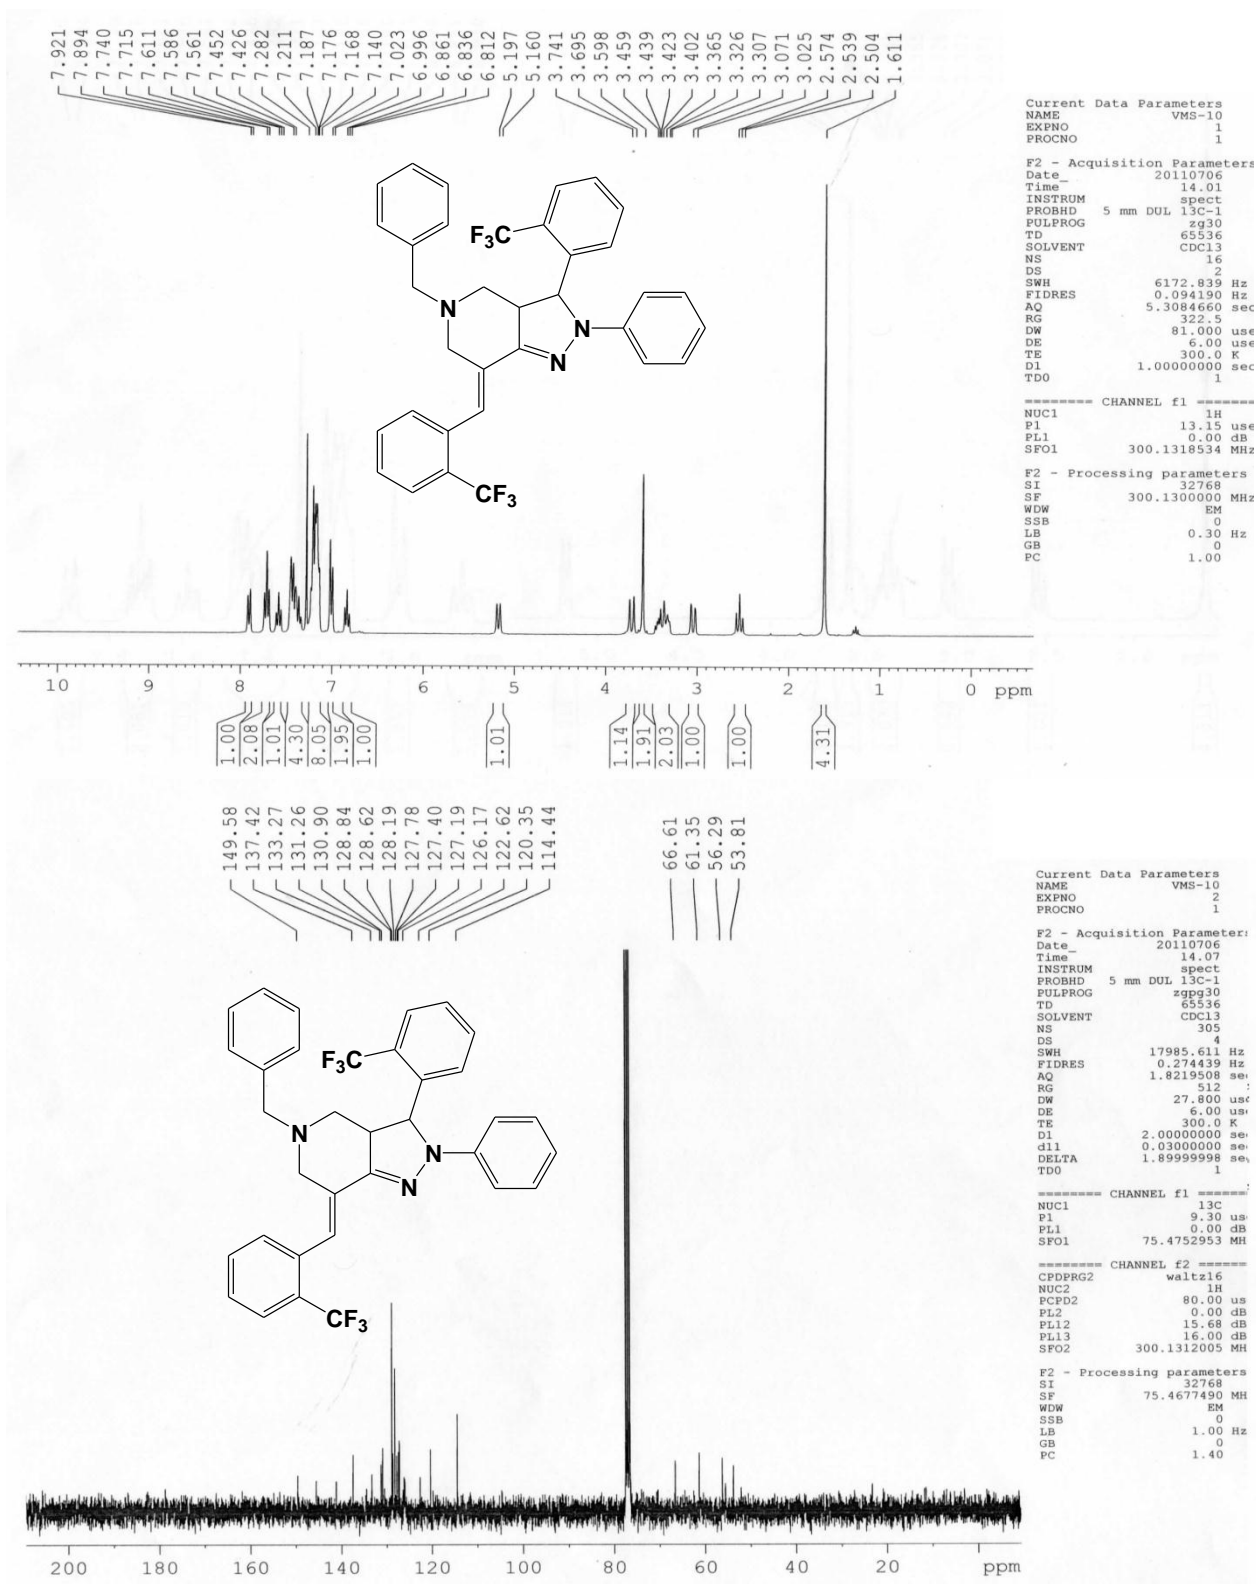

Figure S12 <sup>1</sup>H (top) and <sup>13</sup>C (bottom)-NMR spectra of compound 1e

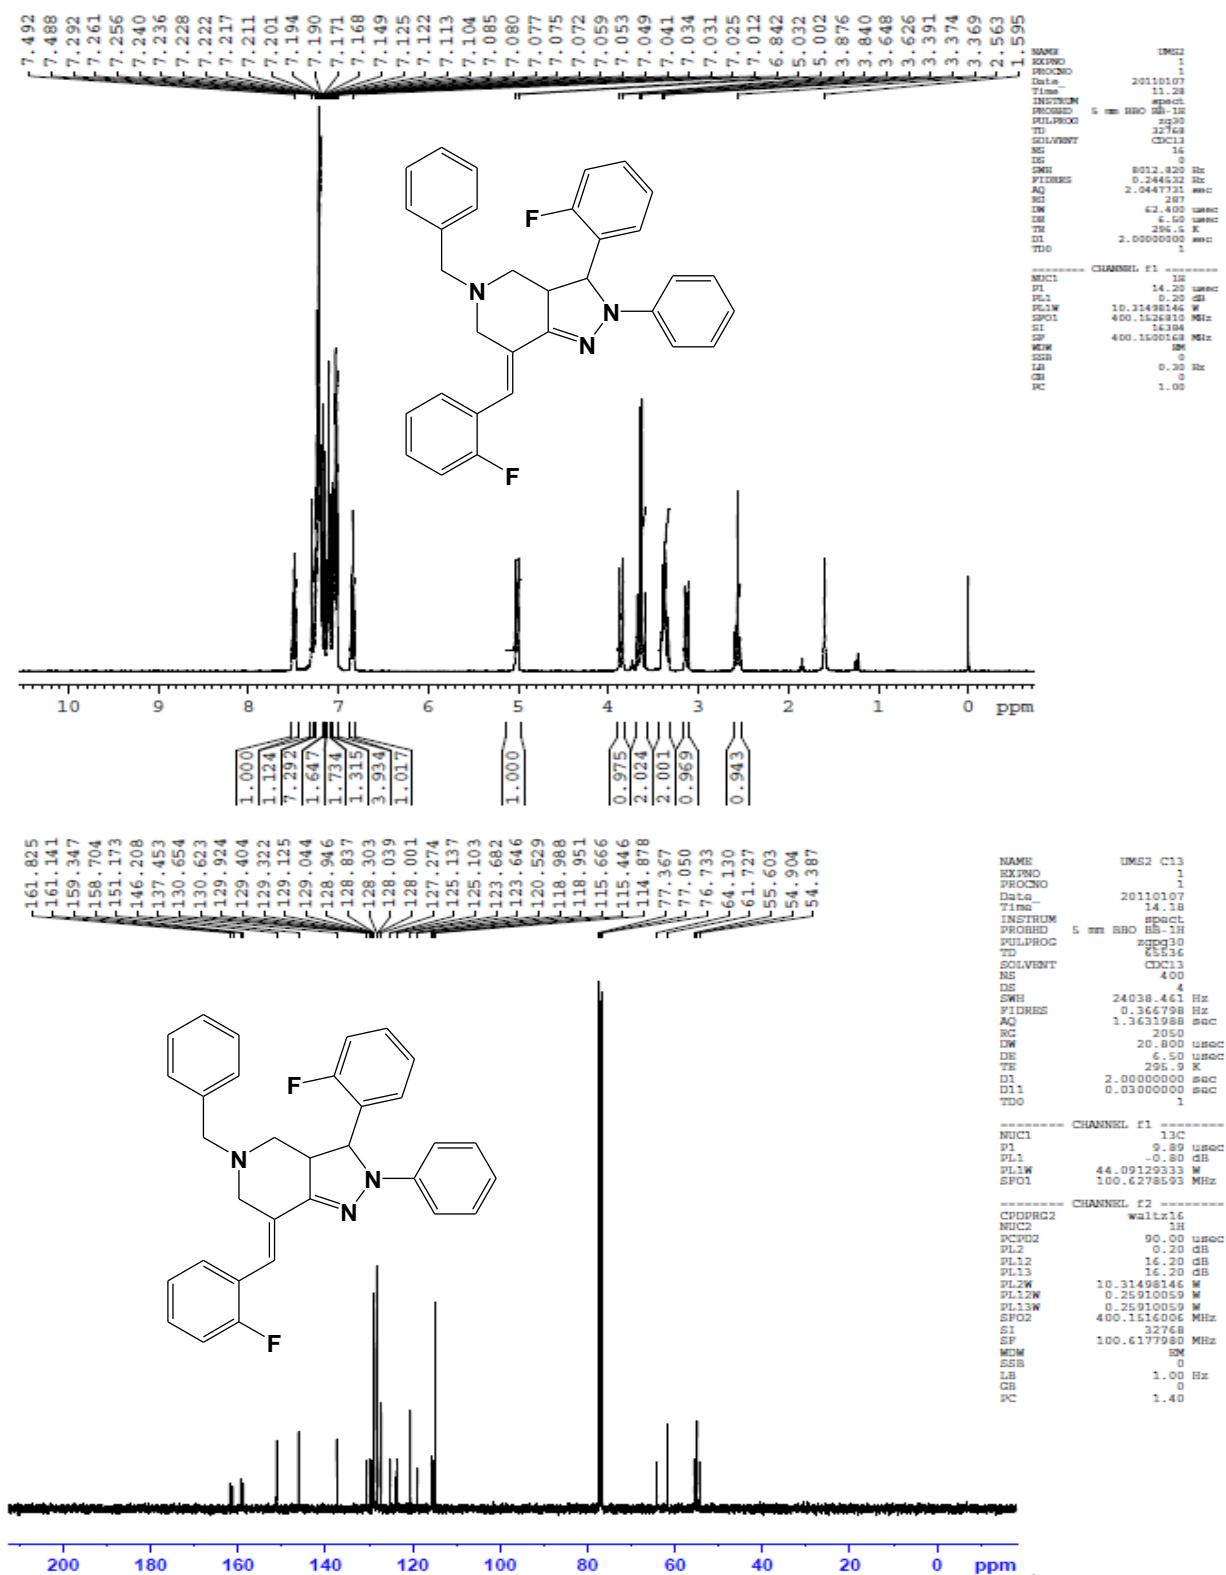

Figure S13 <sup>1</sup>H (top) and <sup>13</sup>C (bottom)-NMR spectra of compound 1c

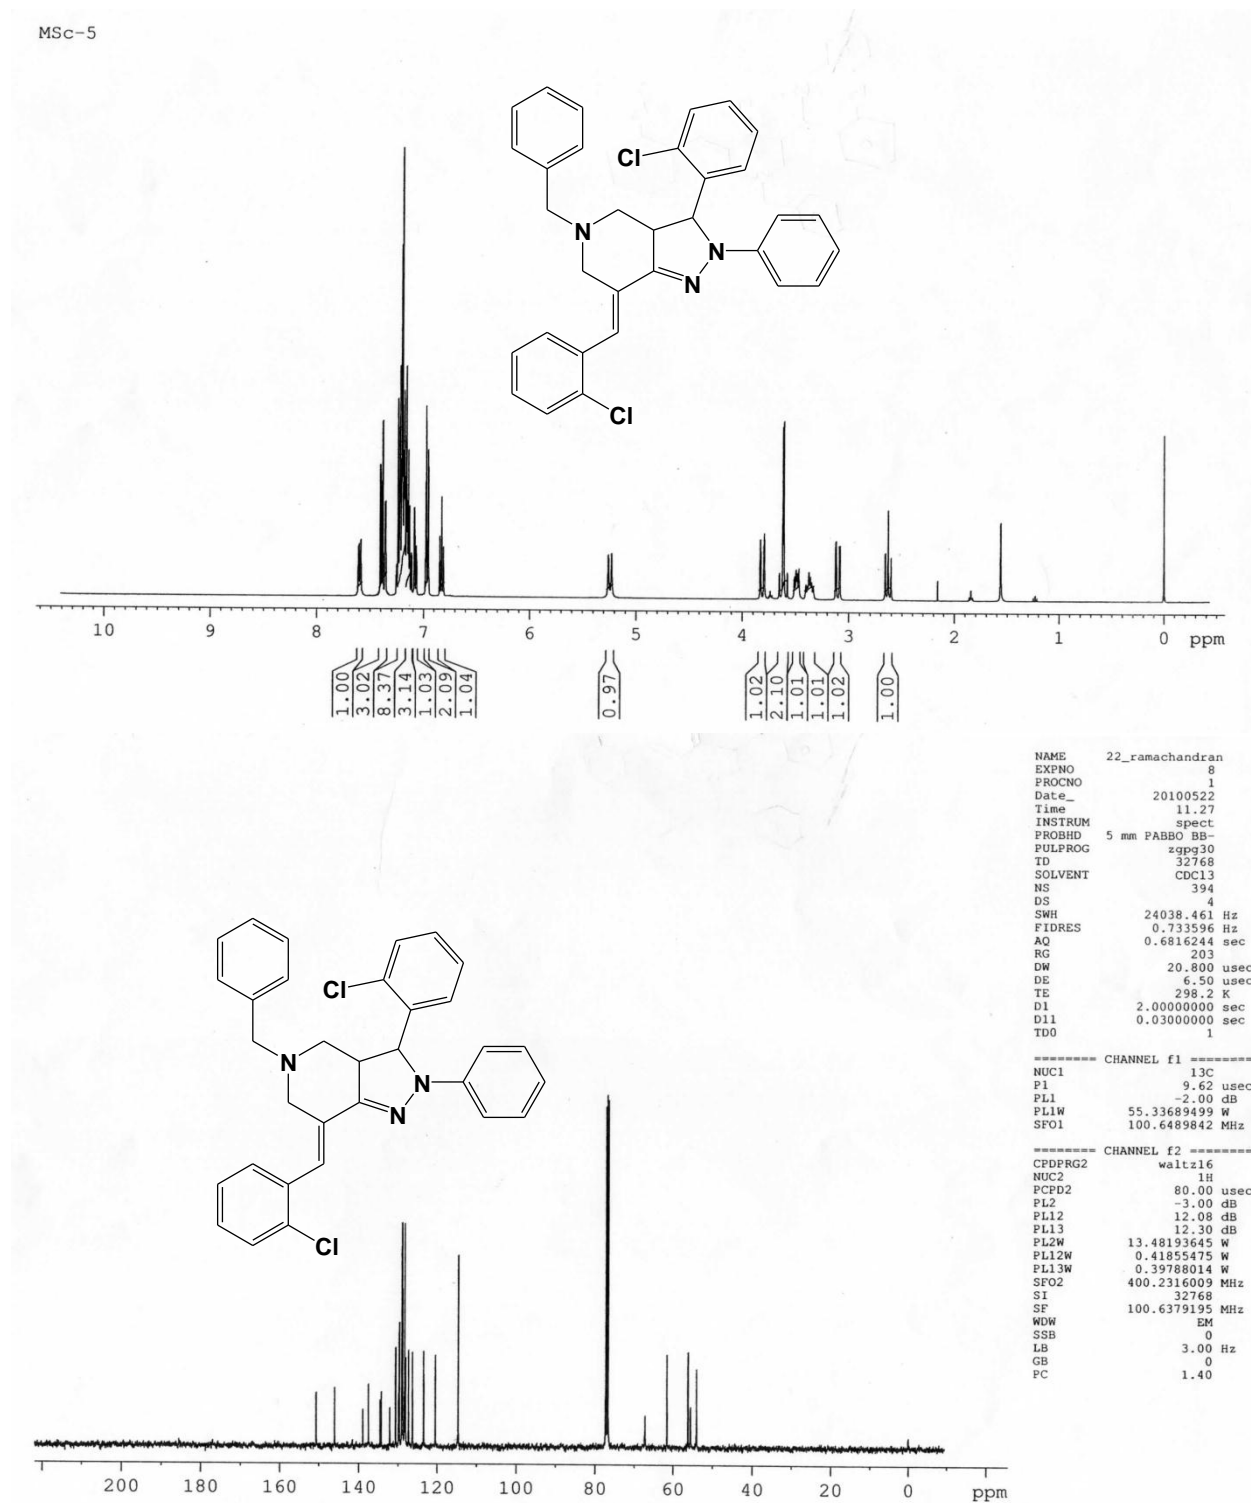

Figure S14  $^1\text{H}$  (top) and  $^{13}\text{C}$  (bottom)-NMR spectra of compound **1d**



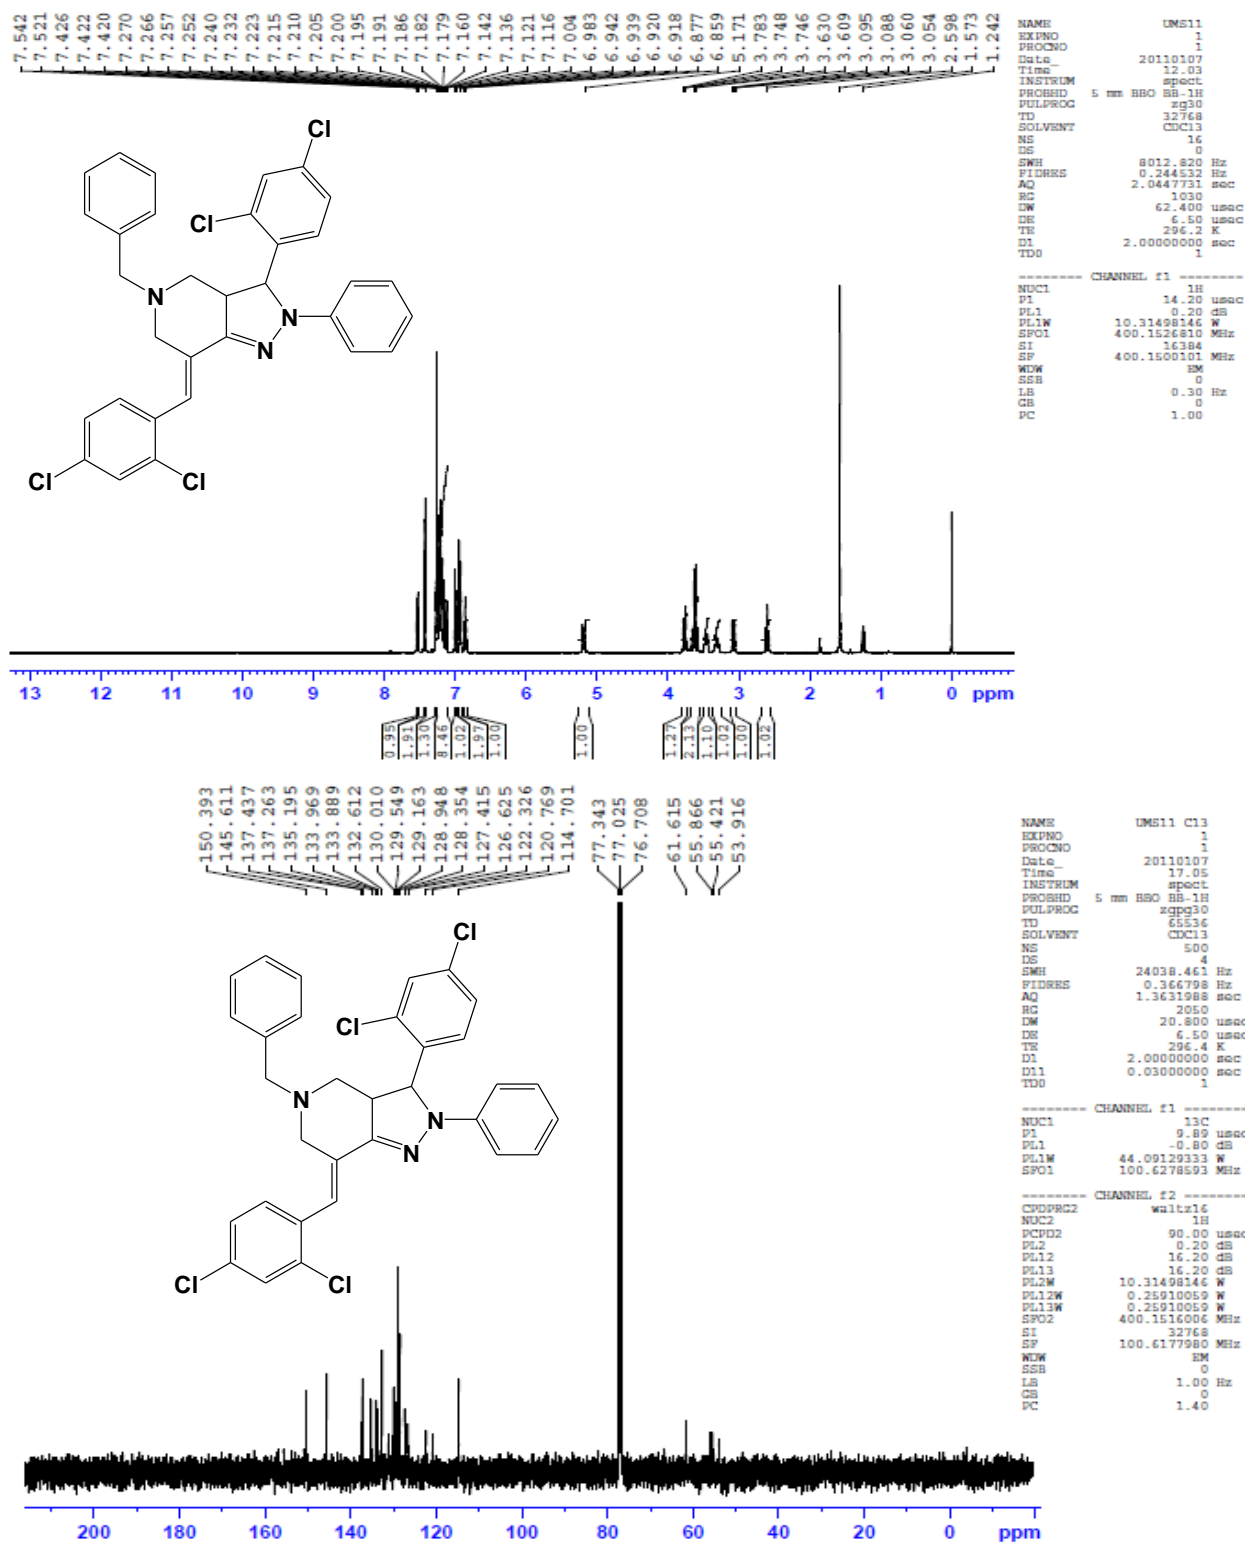

Figure S15 <sup>1</sup>H (top) and <sup>13</sup>C (bottom)-NMR spectra of compound **1f**

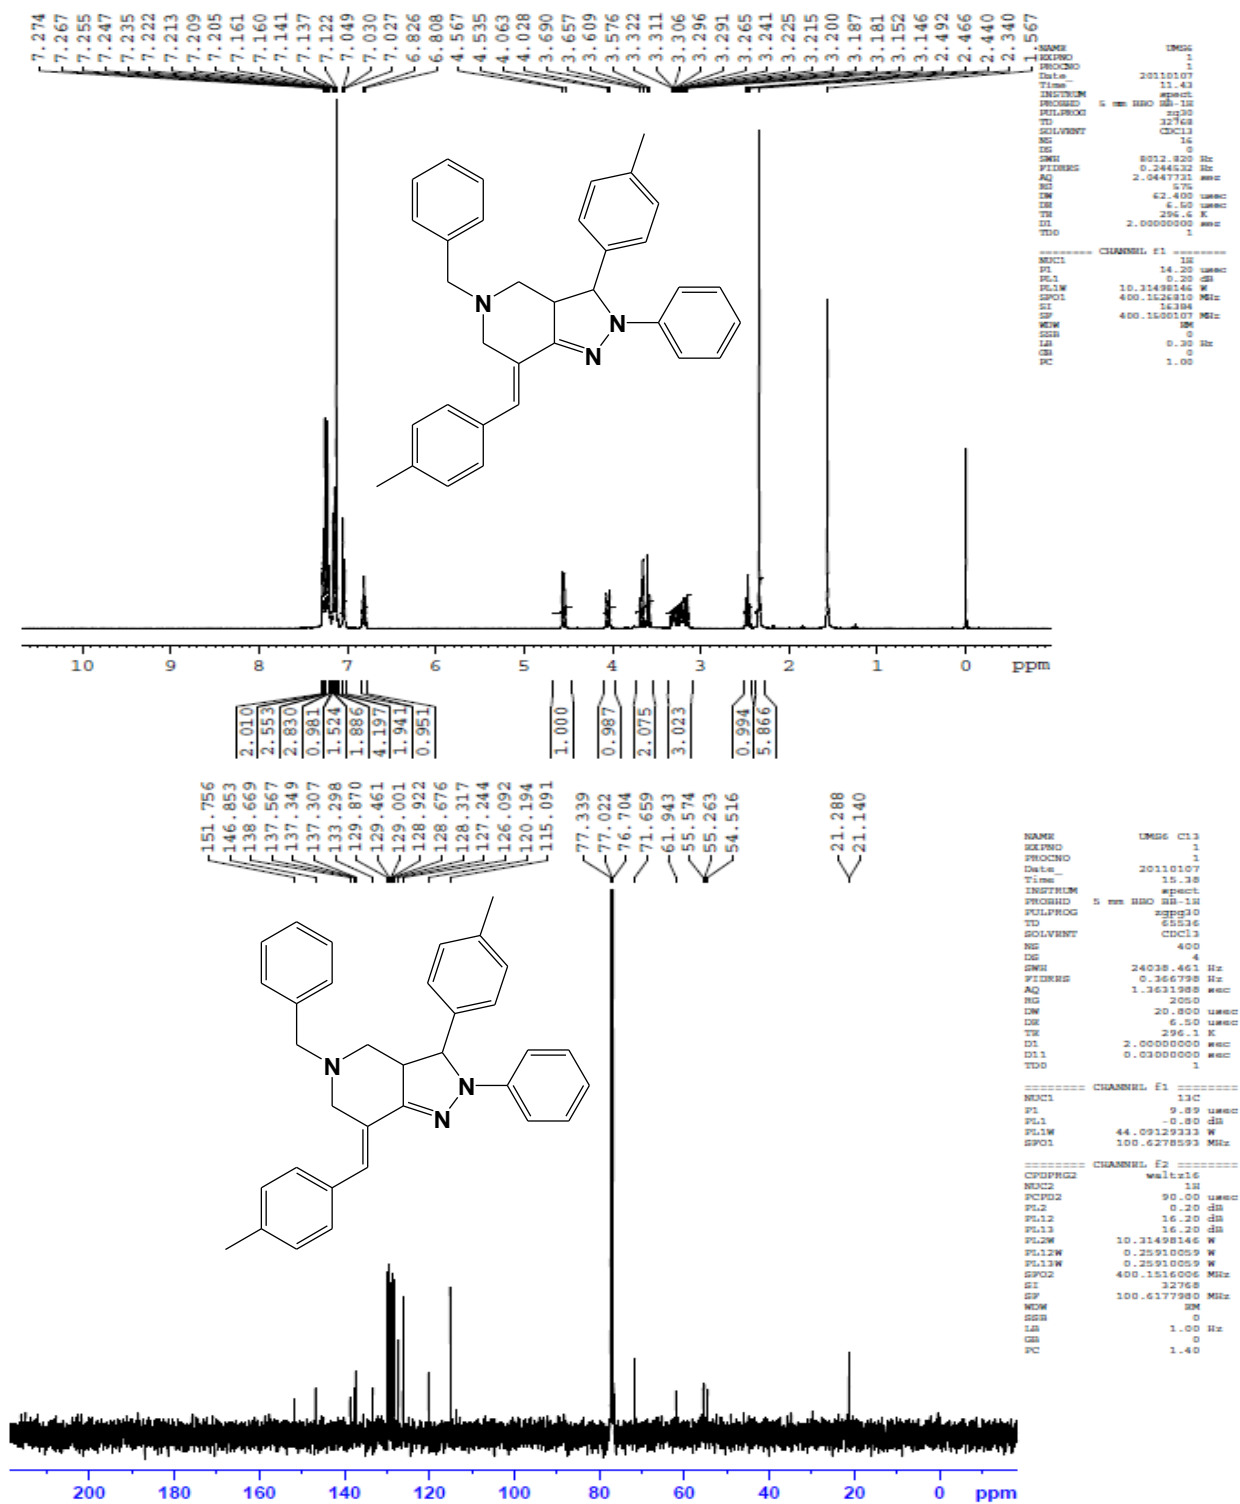

Figure S16 <sup>1</sup>H (top) and <sup>13</sup>C (bottom)-NMR spectra of compound 2a



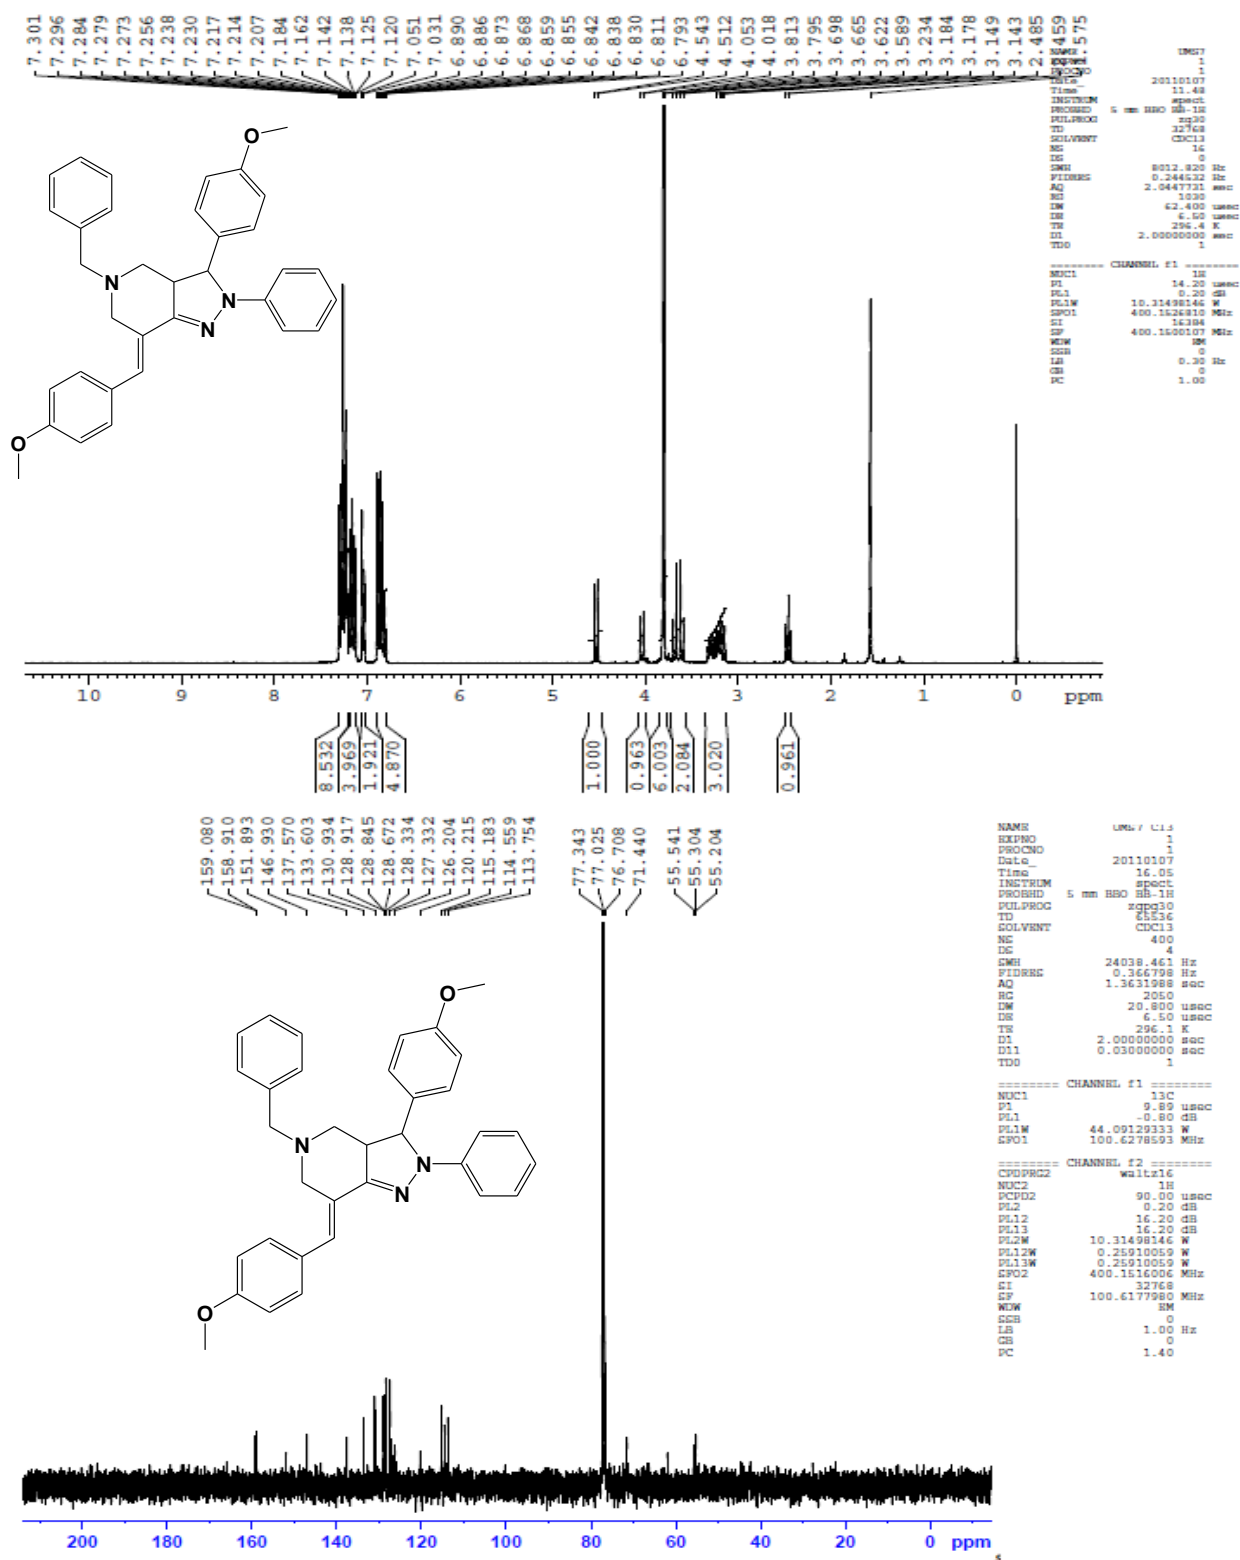

**Figure S17** <sup>1</sup>H (top) and <sup>13</sup>C (bottom)-NMR spectra of compound **2b**

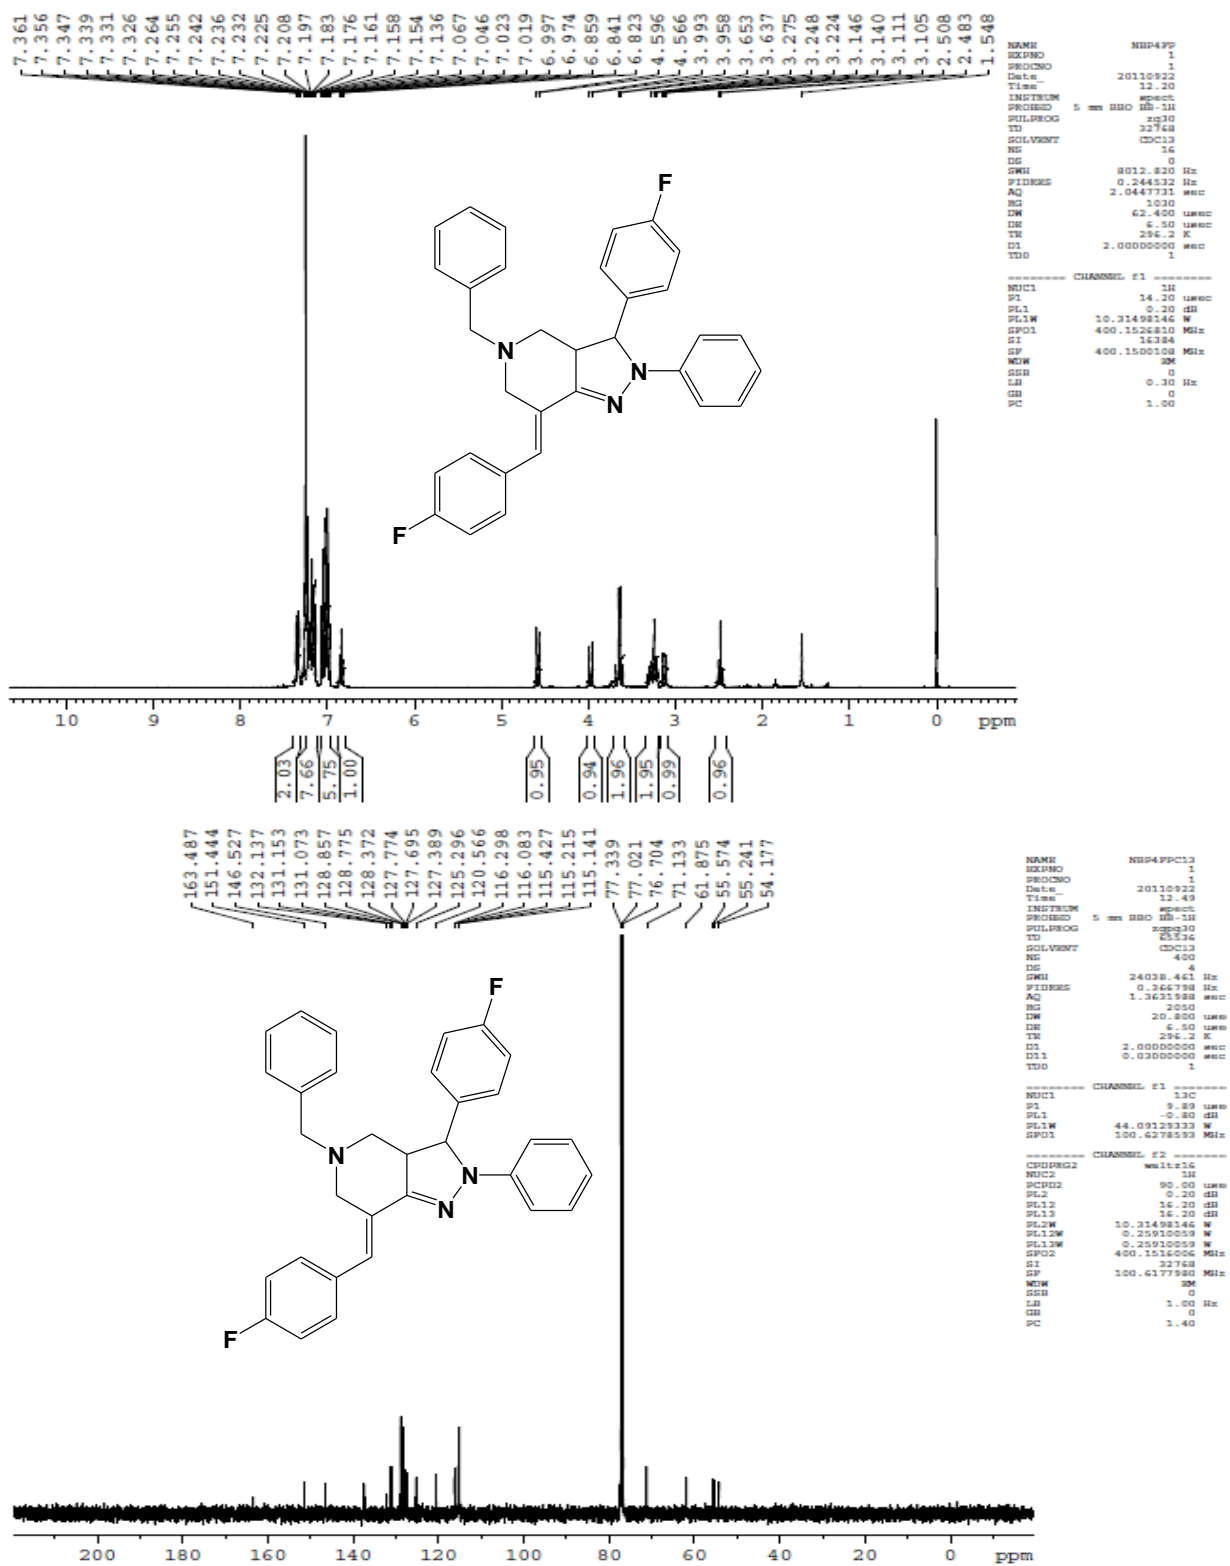

Figure S18 <sup>1</sup>H (top) and <sup>13</sup>C (bottom)-NMR spectra of compound 2c

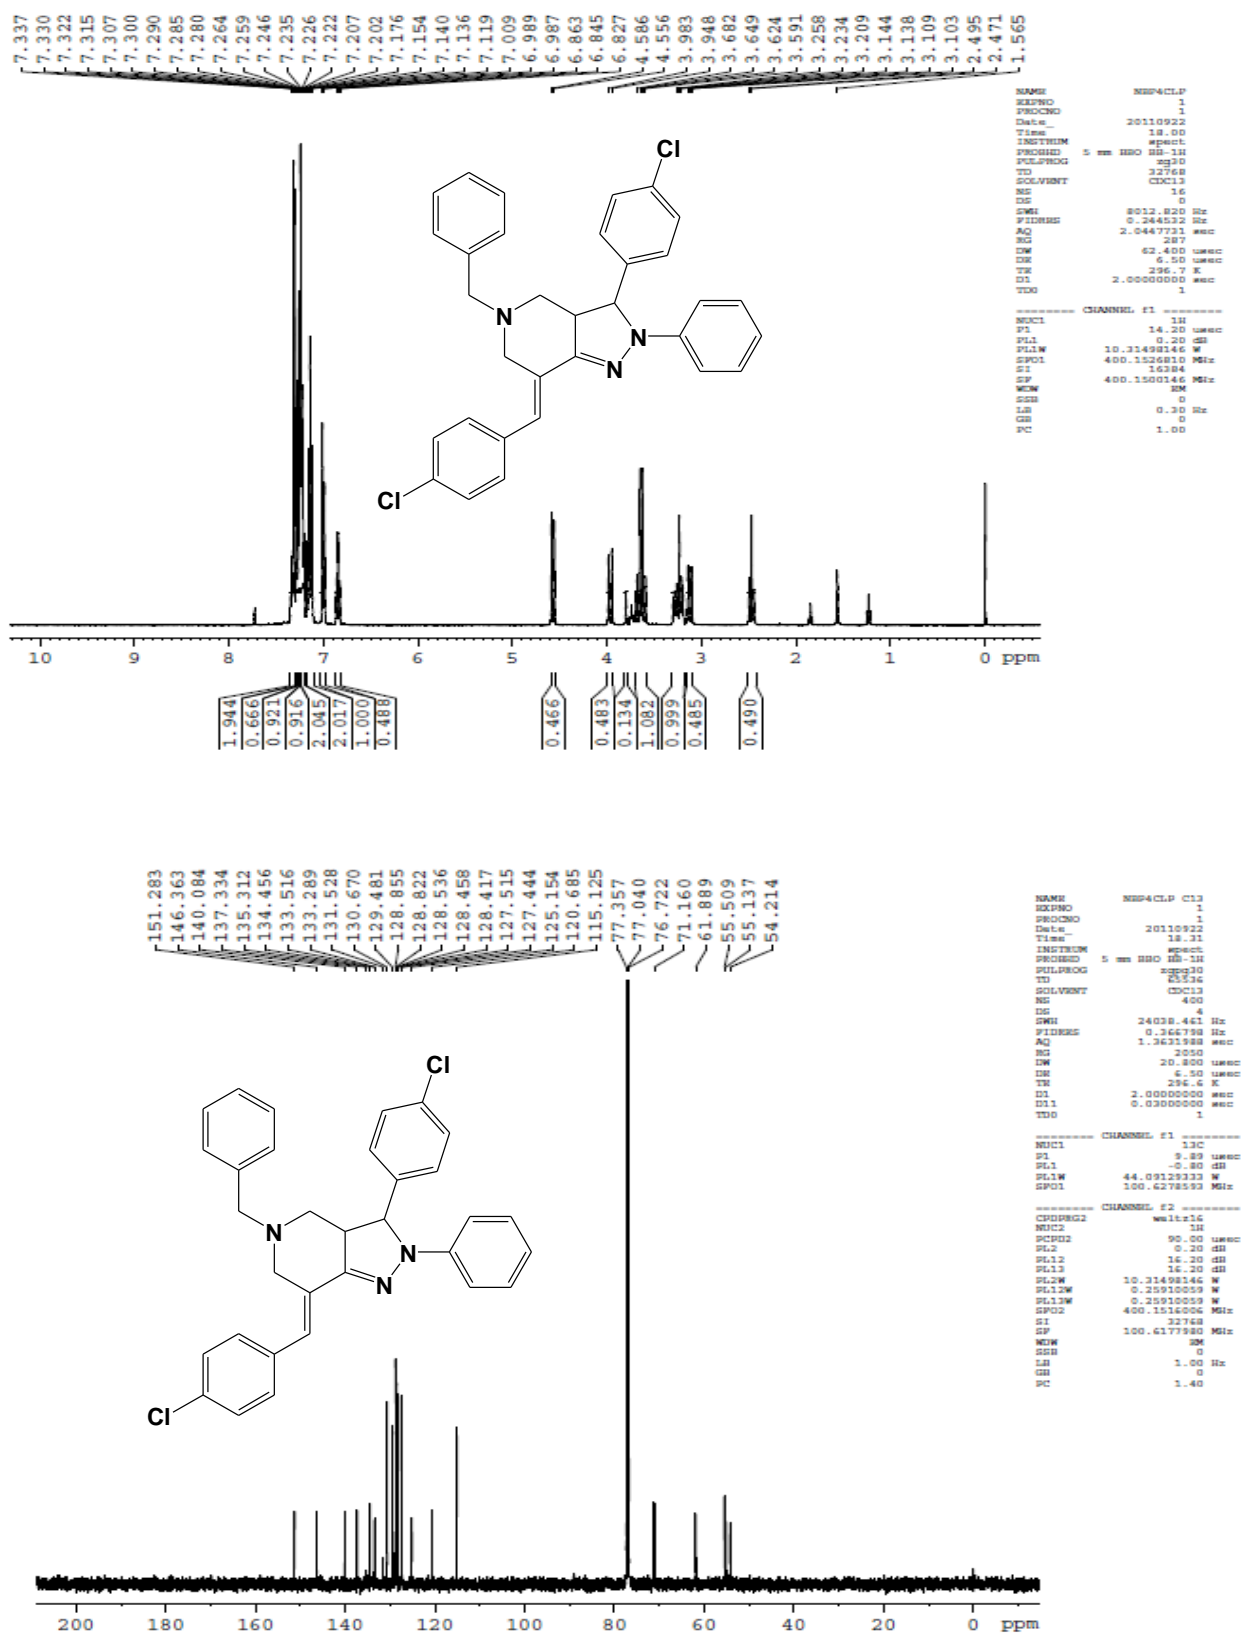

Figure S19 <sup>1</sup>H (top) and <sup>13</sup>C (bottom)-NMR spectra of compound 2d

### Cartesian coordinates of compound 1

|   |             |             |             |
|---|-------------|-------------|-------------|
| C | 0.34732600  | -0.54418000 | -0.61765000 |
| C | 0.19108200  | 0.93678100  | -0.30921800 |
| C | -1.11129200 | 1.50370800  | 0.02384100  |
| C | -2.05575500 | 0.51004600  | 0.69442200  |
| C | -0.55746700 | -1.39637400 | 0.27741400  |
| C | 1.90101300  | -0.72583000 | -0.56008800 |
| H | -1.82877400 | 0.51996900  | 1.78367500  |
| H | -0.20660400 | -1.37125900 | 1.32519800  |
| C | -1.36811500 | 2.82394600  | -0.14990500 |
| C | -2.60864700 | 3.57451900  | 0.12699500  |
| C | -2.51973200 | 4.83402500  | 0.75821500  |
| C | -3.88505400 | 3.12271300  | -0.27118600 |
| C | -3.66357800 | 5.59202900  | 1.02006800  |
| H | -1.54346100 | 5.20936900  | 1.05109300  |
| C | -5.02866100 | 3.88406600  | -0.01346600 |
| H | -3.97459500 | 2.19184400  | -0.82128100 |
| C | -4.92514400 | 5.11764500  | 0.64039800  |
| H | -3.57049300 | 6.55341700  | 1.51581900  |
| H | -5.99944500 | 3.52017600  | -0.33604900 |
| H | -5.81411500 | 5.70780000  | 0.83882200  |
| H | -0.53727300 | 3.42654400  | -0.51487400 |
| H | -0.55991000 | -2.43988700 | -0.04794700 |
| H | -3.09333900 | 0.82391400  | 0.59064200  |
| H | 0.01097100  | -0.70246300 | -1.65272000 |
| C | 3.63990100  | 1.14440400  | -0.93542600 |
| C | 3.91772200  | 2.52721600  | -0.98841800 |
| C | 4.68651100  | 0.22485200  | -1.15374000 |
| C | 5.21364600  | 2.96762400  | -1.25376800 |
| H | 3.11179600  | 3.22955900  | -0.82325900 |
| C | 5.97839100  | 0.68650300  | -1.42080800 |
| H | 4.50108400  | -0.84098700 | -1.10089800 |
| C | 6.25555900  | 2.05618800  | -1.47401000 |
| H | 5.41005500  | 4.03504500  | -1.29141700 |
| H | 6.77215800  | -0.03613300 | -1.58470300 |
| H | 7.26084100  | 2.40733500  | -1.68136100 |
| C | 2.43489000  | -1.40370300 | 0.69767400  |
| C | 2.67992800  | -0.68036400 | 1.87616600  |
| C | 2.65742500  | -2.79050600 | 0.69132000  |
| C | 3.13143100  | -1.33517000 | 3.02670500  |
| H | 2.53072300  | 0.39418200  | 1.88296700  |
| C | 3.10685100  | -3.44645500 | 1.84267300  |
| H | 2.48295400  | -3.35852200 | -0.21933500 |
| C | 3.34371000  | -2.71940500 | 3.01471500  |
| H | 3.32216200  | -0.76421500 | 3.92997900  |
| H | 3.27834600  | -4.51818100 | 1.82168000  |
| H | 3.69777500  | -3.22465100 | 3.90767400  |
| N | 2.33886700  | 0.69413300  | -0.68875800 |
| N | 1.31356300  | 1.59630300  | -0.40565300 |
| N | -1.93111800 | -0.86118100 | 0.15364500  |
| H | 2.23860000  | -1.28958900 | -1.43559700 |
| C | -2.96901000 | -1.77627100 | 0.66443600  |
| H | -3.91672300 | -1.22112600 | 0.64733500  |
| C | -3.11531000 | -3.03698400 | -0.17004200 |

|   |             |             |             |
|---|-------------|-------------|-------------|
| C | -3.14443800 | -2.96287500 | -1.57343500 |
| C | -3.26764100 | -4.28867900 | 0.44546000  |
| C | -3.32775700 | -4.11644400 | -2.34152400 |
| H | -3.00868200 | -1.99656200 | -2.04769400 |
| C | -3.45624600 | -5.44481900 | -0.32200600 |
| H | -3.23753300 | -4.35829400 | 1.52974400  |
| C | -3.48714600 | -5.36141200 | -1.71805300 |
| H | -3.34821800 | -4.04572700 | -3.42490500 |
| H | -3.57247800 | -6.40604100 | 0.16922700  |
| H | -3.63058700 | -6.25648500 | -2.31532000 |
| H | -2.79077500 | -2.05457200 | 1.72233100  |
